# Supplementary material
Source: PubMed Central journal article supplement (PMC2311347)
Supplement: 0800981105_Supplemental_PDF.pdf [file 0800981105_Supplemental_PDF.pdf]

# Supporting Information

Alcaraz *et al.* 10.1073/pnas.0800981105

## Supporting Text

**Strains and Media.** *Bacillus coahuilensis* was isolated by the group of V.S. from water column in the desiccation pond named Laguna Grande of the Churince system. NRRLB14911 was isolated from water columns in the Gulf of Mexico by J.S. Marine medium (US Biological) was used for general growth purposes and a modified marine medium was used to determine amino acid requirements and growth under different phosphate concentrations. This modified marine medium contained 0.5% casein hydrolysate (Difco), 5.48 mM sorbitol, 0.41 mM Fe (III) citrate, 40 mM MgSO<sub>4</sub>·7H<sub>2</sub>O, 0.33 M NaCl, 9 mM CaCl<sub>2</sub>, 0.67 mM KCl, 0.67 mM KBr, 0.47 mM NaF, 0.35 mM H<sub>3</sub>BO<sub>3</sub>, 0.19 mM (NH<sub>4</sub>)NO<sub>3</sub>, 4.7 μg/ml vitamin B complex. The concentration of Na<sub>2</sub>HPO<sub>4</sub> was varied as indicated. pH was adjusted to 7 with 10 M NaOH.

**Genome Sequencing.** The genomic DNA of M44 was isolated, by using a standard technique, from pure cells cultured in marine medium (US Biological). Shotgun libraries were prepared using *Escherichia coli* DH12S, a host suited for the stable cloning of methylated DNA (Invitrogen). The entire genome sequence was obtained from a combination of 16,698 end sequences (providing 6-fold coverage) from a pUC18 genomic shotgun library (2–5 kb) using dye terminator chemistry on automated DNA sequencers (ABI3700, Applied Biosystems) and 454 technology with seven runs and a 29-fold coverage. Synteny-guided gap closure for some contigs was performed by PCR direct sequencing using primers designed to anneal to each end of the neighboring contigs. Tail PCR was carried out from ends of contigs for which we had no synteny information. Fifteen scaffolds were assembled. The ends of 43 contigs consisted of highly similar repeat sequences and we did not attempt to determine their exact order because these sequences did not provide new gene information. A pseudogenome was assembled for the annotation process.

**Genome Analysis.** Two independent assemblies were performed, one assembly of the 454 by using its Newbler assembler (<http://www.454.com/enabling-technology/the-software.asp>) and one assembly of the Sanger reads by using Phred-Phrap (1) with default parameters in both cases. With the two sets of assemblies, all Vs. all alignments were performed with the MUMmer package (2) by using regions with a minimum overlap of 100 bp. A new consensus assembly of the hybrid sequences was conducted by using the CAP3 assembler (3) and manually curated. To assess the orientation and synteny conservation of the newly assembled fragments, we made Promer alignments (2) and plots versus *B. cereus* E33L, *B. cereus* ATTC 10987, *B. cereus* ATTC 14579, *B. anthracis* str. ‘Ames,’ *B. anthracis* str. ‘Ames ancestor,’ *B. anthracis* str. Sterne, *B. thuringiensis* serovar konkukian, *B. licheniformis* ATCC 14580, *B. halodurans* C-125, *Geobacillus kaustophilus* HTA426, *B. subtilis* str. 168, *Oceanobacillus theyensis* HTE831, *B. clausii* KSM-K16, and *Bacillus* sp. NRRLB-14911.

Gene prediction was done by using Glimmer v3.02 (4) and GeneMark.hmm (5) for prokaryotes, followed by the automatic annotation pipeline using BASys system (6), which retrieves sequence information from SWISS PROT, InterPro, Pfam, PROSITE, COG, GO, KEGG, and NCBI NR databases, among other databases. Transfer RNAs were detected by using tRNAscan-SE (7). Annotations were checked manually and frameshift corrections were performed by using FrameD (8) along with the original reads. Extra annotation of small (<100

bp) ORFs of known function was done manually. Sequence manipulation, parsing, and statistical features like genome size, GC%, codon usage, and CAI were obtained through the EMBOSS 3.0 package (9) and Perl scripts.

Phylogenomics analyses were done according to Ciccarelli *et al.* (10) after first searching all of the universally conserved COGs across all of the sequenced *Bacillus* spp. resulting in a list of 20 genes (see supporting information (SI) Table S3). Each translated sequence was aligned individually first with MUSCLE (11) and then concatenated. Phylogeny was reconstructed using tree-puzzle (12) with the following criteria: quartet puzzling, approximate quartet likelihood, 1,000 puzzling steps, exact parameter estimates, WAG (13) model of substitution, and gamma-distributed rates estimated from the dataset.

Orthologues between the *Bacillus* spp. were obtained through best bidirectional blastp (14) with a cutoff value of 1e<sup>-10</sup> of at least 70% the length of the product. Paralogous analysis was done as described by Pushker *et al.* (15). Metabolic pathway reconstruction was done by using KEGG Automated Annotation Server (<http://www.genome.ad.jp/kegg/kaas/help.html>).

HMM profiles (16) were built and calibrated for 51 translated genes related to the nitrogen cycle comprising all of the series of assimilatory and dissimilatory reactions involving both inorganic and organic forms of nitrogen. The protein sequences used for the HMM search included: AIIc, Alr, ArcA, ArcC, ArgD, ArgF, ArgG, ArgH, AspA, CarB, Chi, ChiA, ChiD, ChiHal, Chitin, CreA, CycA, DagA, GdhA.arch, GdhA.baesu, GdhA.ecol, GlnA, GlnB, GltB, Hcp, Hmp, HutH, IlvE, LdcA, LytC, NagZ, NapA, NarG, NarH, NarI, NarJ, NasAt, NirA, NorB, NorZ, NtcA, NtrC, PbpC, Rgl, RocF, TrpC, TrpF, TyrB, UreA, UreB, and UreC.

ABC importers’ gene families were searched for by means of building and calibrating HMM profiles for each of the import families deposited in the ABCISSE (17) database (<http://www.pasteur.fr/recherche/unites/pmtg/abc/database.iphtml>). We also performed Wilcoxon’s Signed-Ranks Matched Pairs Test between the ABC importers within the genomes of *B. coahuilensis*, NRRL, *B. subtilis*, and *O. iheyensis* and found differences between all of them ( $P < 0.05$ ).

To identify windows that contained regions with unusual composition properties (RUCPs) within *B. coahuilensis* genome the Similarity Plot (S-plot) (18) application was used. This method was recently presented as an alternative means for identifying potential horizontally transferred elements. To assess the degree and pattern of similarity (or dissimilarity) between two genomic sequences of size  $M_1$  and  $M_2$ , the genomes are divided into windows of length  $w$  slide along each genome with steps (the distance between the start of two neighboring windows) of size  $s$ . Similarity is quantified by using the Pearson correlation coefficient between the frequencies of  $n$ -mers (short subsequences of length  $n$ ). By first comparing the genome of interest against itself, the degree of homogeneity of the genome can be determined as the average correlation value across all windows. Next, the degree of similarity of each window with respect to its own genome is calculated as the average of the correlation coefficients for each window against all other windows in the genome for which it is located. Because it is our intent to identify foreign DNA, windows that are unusually dissimilar to the rest of their genome are of particular interest.

Each of the 115 RUCPs of *B. coahuilensis* is compared with 430 complete as well as partial sequenced microbial genomes available from the NCBI database by using S-plot. Included in

these genomes are 10 *B. anthracis* (3 complete, 7 whole genome shotguns), 3 *B. cereus*, 1 *B. clausii*, 1 *B. halodurans*, 2 *B. licheniformis*, 1 *B. subtilis*, 1 *B. thuringiensis*, 1 *Geobacillus kaustophilus*, and 1 *Oceanobacillus iheyensis* genomes. For each RUCP the most similar window in all of these genomes was identified. Seven RUCPs were identified as having a matching window, >0.7 in one of these other microbial genomes indicating a highly correlated/similar sequence. These windows are likely to share the same functionality with the identified windows in the other microbial genomes. Therefore, these windows are not likely to have been introduced by HGT. The remaining 108 windows may have been introduced into the *B. coahuilensis* genome as a result of HGT.

Additionally, a second search round for HGT elements was performed by means of best bidirectional blastp (14) hit with an evaluate of  $1e^{-10}$  by using as query all of the genes of *B. coahuilensis* against a cyanobacterium and Archaea database retrieved from KEGG database including the following species (KEGG organism): syn, syw, syc, syf, syd, sye, syg, cyb, tel, gvi, ana, ava, pma, pmm, pmt, pmn, pmi, pmb, pmc, pmf, pmg, pme, ter, mja, mmp, mmq, mac, mba, mma, mbu, mtp, mhu, mla, mem, mth, mst, mka, afu, hal, hma, hwa, nph, tac, tvo, pto, pho, pab, pfu, tko, ape, smr, hbu, sso, sto, sai, pai, pis, pcl, tpe, and neq. Results from the bidirectional blastp were filtered to exclude all genes shared between the *Bacillus* spp. to discriminate potential housekeeping genes and parse a list of unique genes shared between *B. coahuilensis*, cyanobacteria, and Archaea.

Retrieval of *B. coahuilensis* rhodopsin, SQD and SQDX orthologous sequences was done through a blastp (e value  $1e^{-10}$ , length 70%, ID >30%) versus NR and environmental databases of NCBI. Multiple alignments were made by using ClustalW (19) with the BLOSUM62 matrix. Phylogenetic analyses were done by using MEGA 3.1 (20) and a neighbor-joining reconstruction with the following parameters: 1,000 replicates bootstrap (seed = 24,054), by using Poisson correction substitution model for amino acids, gaps using complete deletion, assuming independent evolution for each amino acid sequence, and pairwise deletion was used when comparing translated sequences from different organisms.

Homology modeling of *B. coahuilensis* SQD and rhodopsin with crystal structures from *Arabidopsis* and *Anabaena* sp. PCC

7120, respectively, was done by using the SWISS-MODEL web server (<http://swissmodel.expasy.org>) (21) by Deep View (Swiss-Pdb Viewer) (22). PDB templates used were 1I24 for SQD and 1XIO for rhodopsin. WhatCheck summary of SWISS-MODEL reports the following values for SQD and rhodopsins, respectively, were as follows: structure Z-scores: first generation packing quality: -0.178, -0.242; second generation packing quality -1.094, -0.127; Ramachandran plot appearance: -0.075, 0.255; chi-1/chi-2 rotamer normality: 1.221, 0.209; backbone conformation: -0.464, -0.198; and root mean square (rms) Z-scores: bond lengths: 0.690, 0.810; bond angles: 0.950, 1.214; omega angle restrains: 0.874, 0.686; side chain planarity: 1.302, 1.318; improper dihedral distribution: 1.541, 1.302; inside/outside distribution: 1.147, 1.302. Complete WhatCheck and coordinates reports are available on request. Diagram images were produced in Pymol Version 0.99rc6 (<http://www.pymol.org>).

**RT-PCR.** Semiquantitative RT-PCRs were carried out by using SuperScript One Step RT-PCR with Platinum Taq (Invitrogen Life Technologies) at 20, 25, and 30 cycles. Oligos for bacteriorhodopsin *bsr*: 5' TCGCTATGGTCATCCCGTTGTGG (forward); 5' AGAGGGACCTAATAGCCATGCAG (reverse). Oligos for *sqd1*: 5' TCGCCTTACAGTATGATTGACC (forward) and 5' AAGCCCTGTTTGTTCCTGAT (reverse). RNA was obtained by using TRIzol (Invitrogen Life Technologies) from strains grown in modified marine medium supplemented with phosphate at 0.001, 0.005, 0.05, 0.5, and 5 mM. For light/dark experiments, strain was grown on Petri dishes with marine medium grown at 37°C either under white or blue light or in the dark.

**Lipid Extraction and Analysis.** Lipids from *Arabidopsis*, *Cyanobacteria* spp., and *B. coahuilensis* were isolated (details are available on request). Lipid extracts were observed and isolated by using the TLC technique as described (23). For lipid footprint analysis, individual lipids were isolated from TLC plates, duplicates of each lipid spot were analyzed by MALDI-TOF MS technology. Spots corresponding to SQDG were isolated and eluted with 4 volumes of CH<sub>3</sub>Cl: CH<sub>3</sub>OH (2:1 V/V) and 1 volume of 0.9% NaCl. The chloroformic fraction was extracted and evaporated under a constant N<sub>2</sub> stream and resuspended in 100 μl of CH<sub>3</sub>Cl/CH<sub>3</sub>OH/CH<sub>3</sub>Cl/CH<sub>3</sub>OONa (300:665:35 V/V) and analyzed by electro spray ionization MS-MS.

- Ewing B, Green P (1998) Base-calling of automated sequencer traces using phred. II. Error probabilities. *Genome Res* 8:186–194.
- Kurtz S, et al. (2004) Versatile and open software for comparing large genomes. *Genome Biol* 5:R12.
- Huang X, Madan A (1999) CAP3: A DNA sequence assembly program. *Genome Res* 9:868–877.
- Delcher AL, Bratke KA, Powers EC, Salzberg SL (2007) Identifying bacterial genes and endosymbiont DNA with Glimmer *Bioinformatics* btm009.
- Lukashin AV, Borodovsky M (1998) GeneMark.hmm: New solutions for gene finding. *Nucleic Acids Res* 26:1107–1115.
- Van Domselaar GH, et al. (2005) BASys: a web server for automated bacterial genome annotation. *Nucleic Acids Res* 33:W455–W459.
- Lowe TM, Eddy SR (1997) tRNAscan-SE: A program for improved detection of transfer RNA genes in genomic sequence. *Nucleic Acids Res* 25:955–964.
- Schiex T, Gouzy J, Moisan A, de Oliveira Y FrameD (2003) A flexible program for quality check and gene prediction in prokaryotic genomes and noisy matured eukaryotic sequences. *Nucleic Acids Res* 31:3738–3741.
- Rice P, Longden I, Bleasby A (2000) EMBOSS: The European Molecular Biology Open Software Suite. *Trends Genet* 16:276–277.
- Ciccarelli FD, et al. (2006) Toward automatic reconstruction of a highly resolved tree of life. *Science* 311:1283–1287.
- Edgar RC (2004) MUSCLE: Multiple sequence alignment with high accuracy and high throughput. *Nucleic Acids Res* 32:1792–1797.
- Schmidt HA, Strimmer K, Vingron M, von Haeseler A (2002) TREE-PUZZLE: maximum likelihood phylogenetic analysis using quartets and parallel computing. *Bioinformatics* 18:502–504.
- Goldman N, Whelan S (2000) Statistical tests of gamma-distributed rate heterogeneity in models of sequence evolution in phylogenetics. *Mol Biol Evol* 17:975–978.
- Altschul SF, et al. (1997) Gapped BLAST and PSI-BLAST: A new generation of protein database search programs. *Nucleic Acids Res* 25:3389–3402.
- Pushker R, Mira A, Rodriguez-Valera F (2004) Comparative genomics of gene-family size in closely related bacteria. *Genome Biol* 5:R27.
- Bateman A, Haft DH (2002) HMM-based databases in InterPro Brief. *Bioinformatics* 3:236–245.
- Bouige P, Laurent D, Piloyan L, Dassa E (2002) Phylogenetic and functional classification of ATP-binding cassette (ABC) systems. *Curr Protein Pept Sci* 3:541–559.
- Putonti C, et al. (2006) A computational tool for the genomic identification of regions of unusual compositional properties and its utilization in the detection of horizontally transferred sequences. *Mol Biol Evol* 23:1863–1868.
- Thompson JD, Higgins DG, Gibson TJ (1994) CLUSTAL W: Improving the sensitivity of progressive multiple sequence alignment through sequence weighting, position-specific gap penalties and weight matrix choice. *Nucleic Acids Res* 22:4673–4680.
- Kumar S, Tamura K, Nei M (2004) MEGA3: Integrated software for Molecular Evolutionary Genetics Analysis and sequence alignment. *Brief Bioinform* 5:150–163.
- Schwede T, Kopp J, Guex N, Peitsch MC (2003) SWISS-MODEL: An automated protein homology-modeling server. *Nucleic Acids Res* 31:3381–3385.
- Guex N, Peitsch MC (1997) SWISS-MODEL and the Swiss-PdbViewer: An environment for comparative protein modeling. *Electrophoresis* 18:2714–2723.
- Hartel H, Dormann P, Benning C (2000) DGD1-independent biosynthesis of extraplastidic galactolipids after phosphate deprivation in *Arabidopsis* *Proc Natl Acad Sci USA* 97:10649–10654.
- Cerritos R, et al. (2008) *Bacillus coahuilensis* sp. nov. A new moderately halophilic species from different pozas in the Cuatro Ciénegas Valley in Coahuila, México. *Int J Syst Evol Microbiol* 58:919–923.

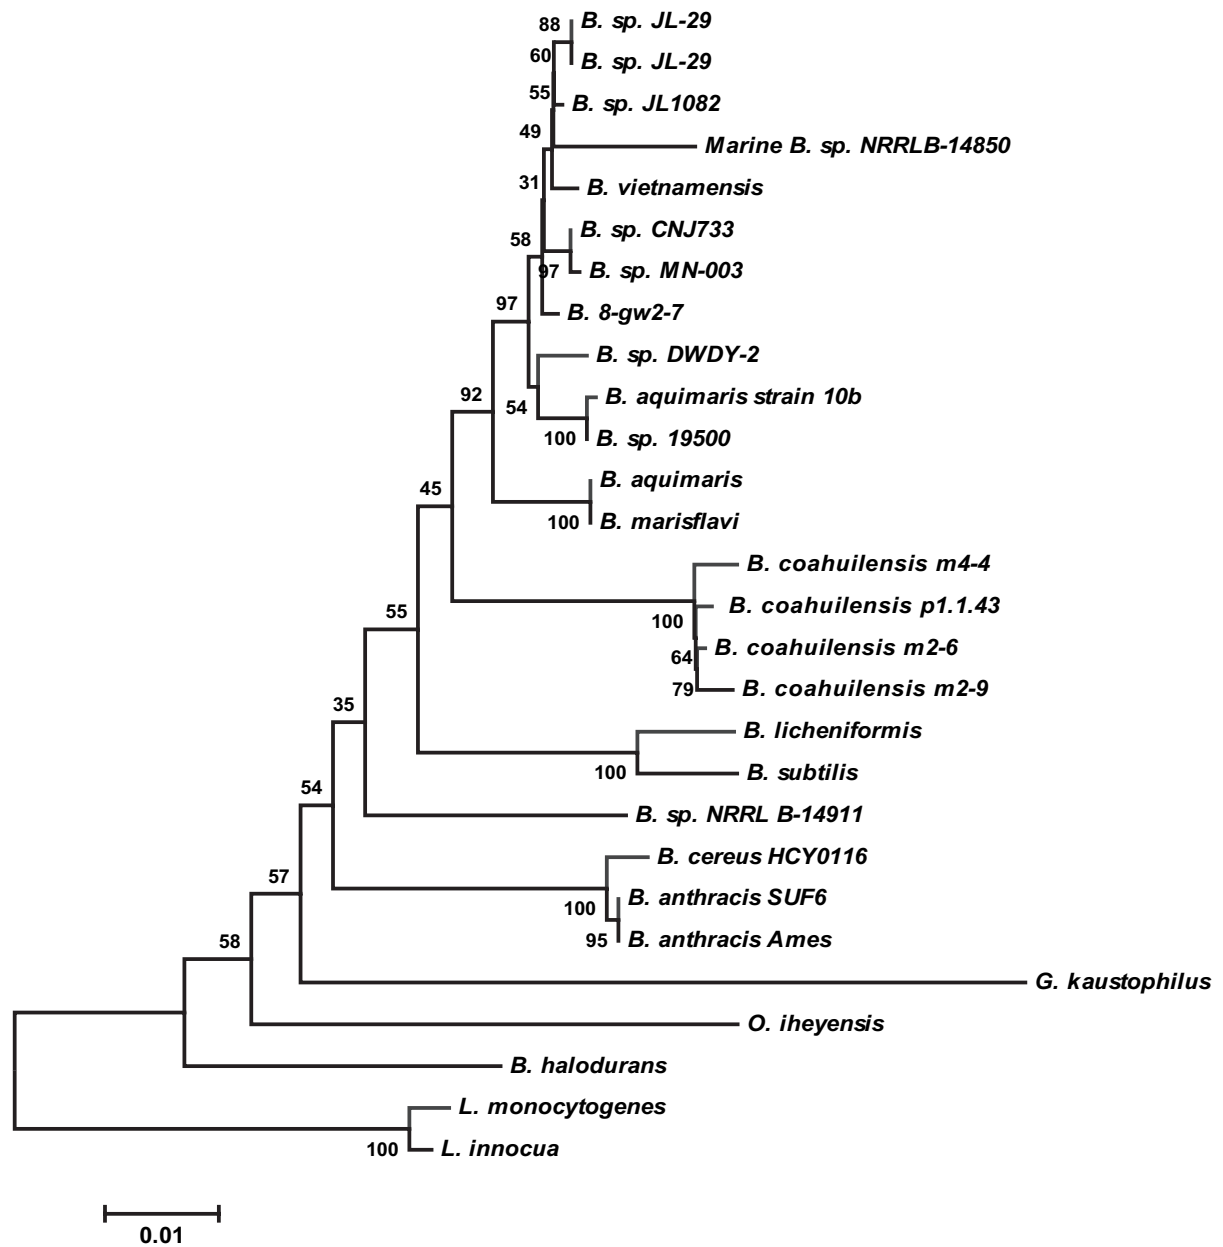

**Fig. S1.** Phylogenetic analysis of the 16S rRNA from *B. coahuilensis* and related species. Neighbor-joining tree of 16S rRNA using Kimura's two-parameter substitution model and 1,000 bootstrap replicates. Shown are the sequenced *B. coahuilensis* (m4–4) as well as other *B. coahuilensis* isolates. Most of the strains shown in the phylogeny were isolated from marine environments, marine sediments, and estuaries. The exceptions are *Bacillus* sp. 19500 and *Bacillus* sp. 8-gw2-7 isolated from a mural paintings tomb in Seville, Spain, and from freshwater in Michigan, respectively. The accession numbers of the strains used in this analysis are: 54303774, 50235228, 118577870, 5524657, 92091064, 15420442, 116266516, 75991537, 16973341, otherwise sequences were retrieved from the whole genome sequence.

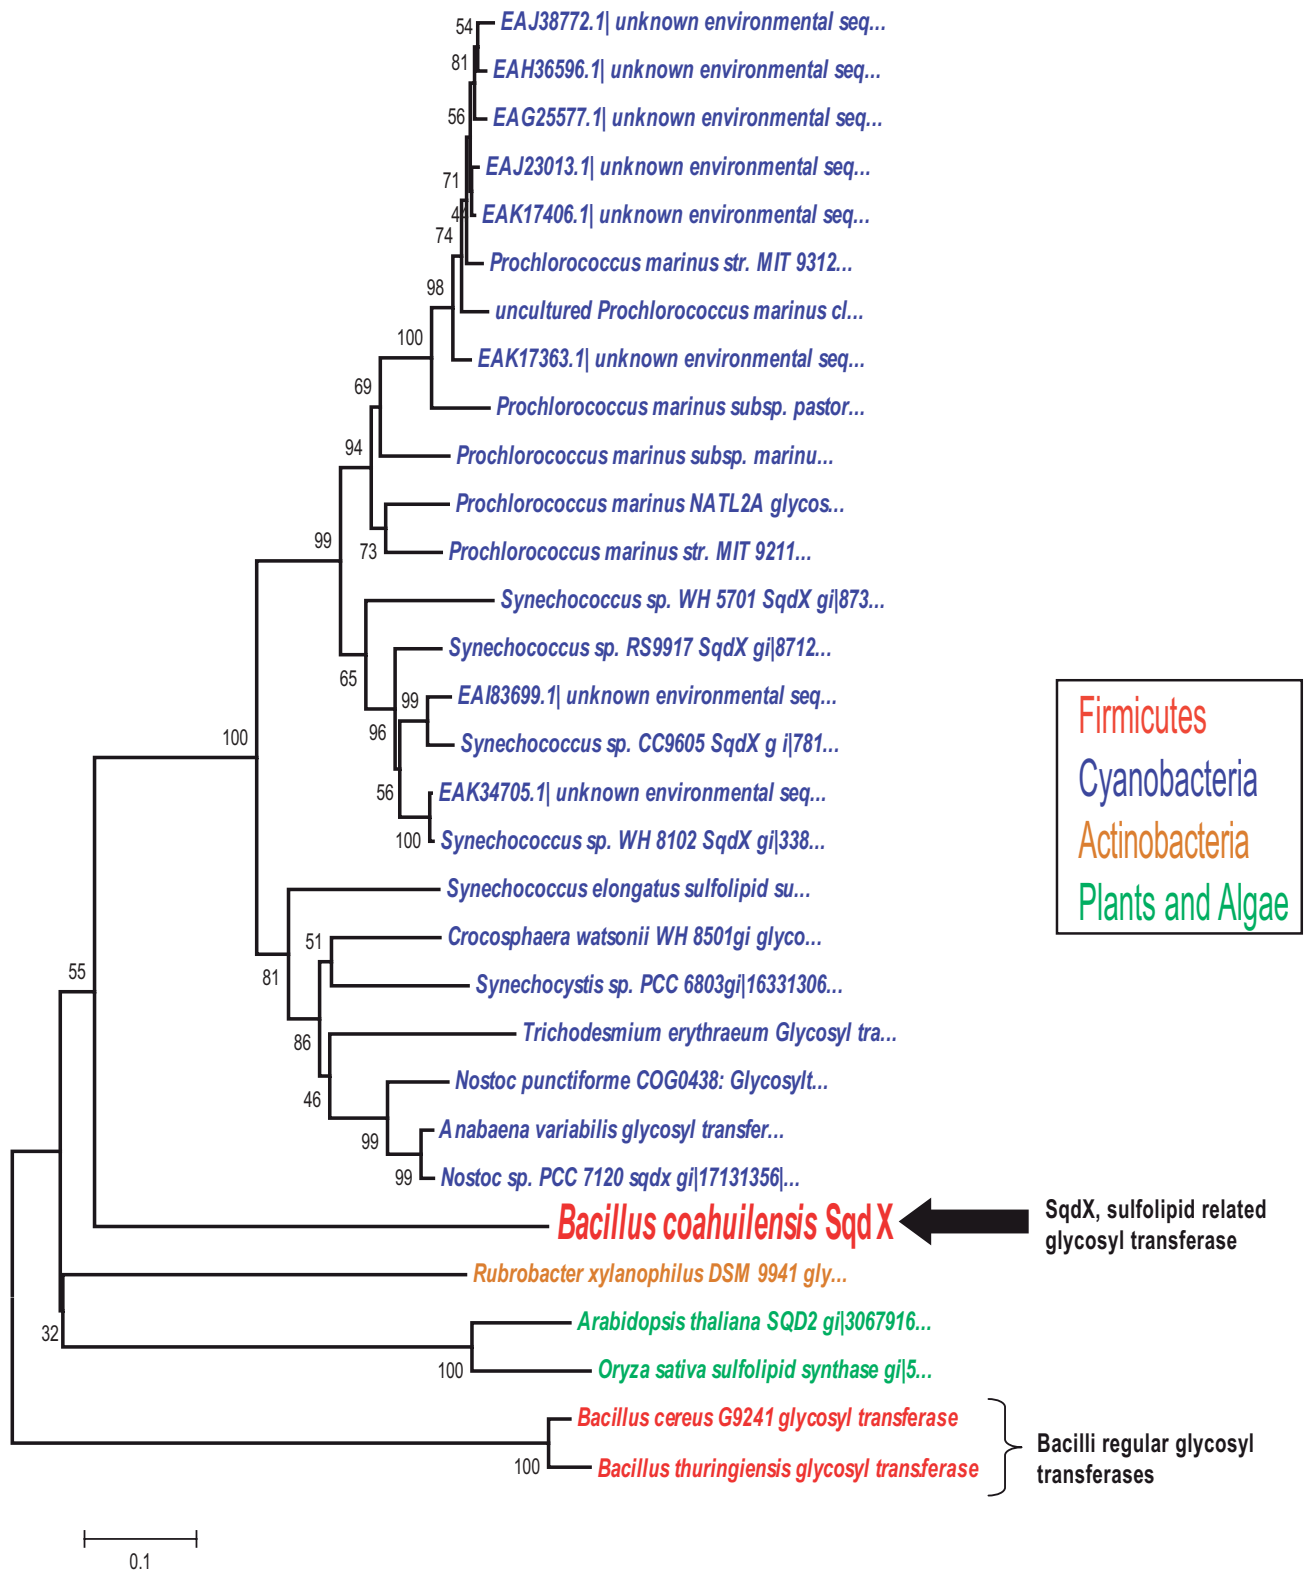

**Fig. S2.** Phylogenetic analysis of the glycosyltransferase coded in the *B. coahuilensis* *sqd* operon. Despite the presence in bacteria of different glycosyltransferases, we show that the glycosyltransferase SqdX in the *B. coahuilensis* SQD1 operon is phylogenetically closer to the plant and cyanobacterial proteins than it is to the bacterial glycosyltransferases, giving support to the horizontal transfer of the SQD1 operon.





A

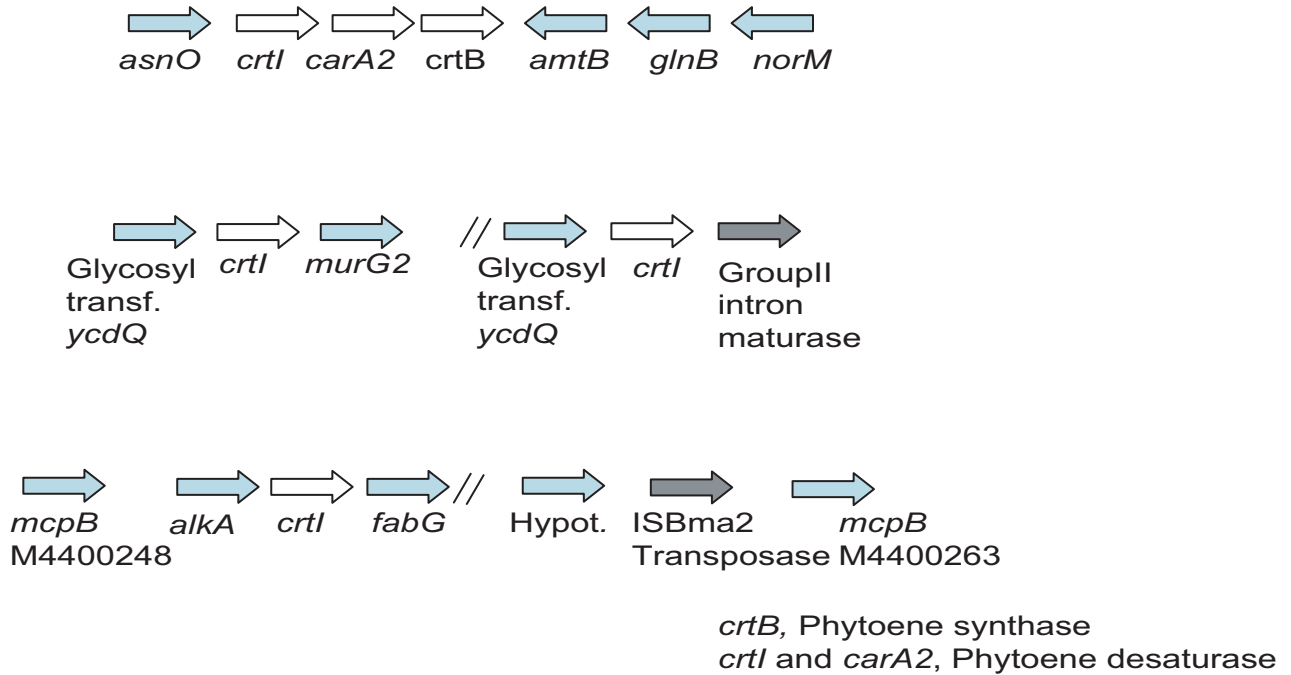

B

**Methyl-accepting chemotaxis proteins in *B. coahuilensis***

|          |             |          |             |
|----------|-------------|----------|-------------|
| M4400025 | <i>mcpC</i> | M4402078 | <i>tlpB</i> |
| M4400248 | <i>mcpB</i> | M4402148 | <i>mcpB</i> |
| M4400263 | <i>mcpB</i> | M4402589 | <i>mcpB</i> |
| M4400630 | <i>tlpA</i> | M4402800 | <i>tlpA</i> |
| M4400687 | <i>mcpB</i> | M4402859 | <i>tlpB</i> |
| M4400745 | <i>tlpB</i> | M4403081 | <i>mcpB</i> |
| M4401183 | <i>mcpB</i> | M4403083 | <i>mcpA</i> |
| M4401184 | <i>mcpC</i> | M4403306 | <i>mcpC</i> |
| M4401682 | <i>tlpB</i> |          |             |

**Chemotaxis response proteins**

|          |             |                                                     |
|----------|-------------|-----------------------------------------------------|
| M4401449 | <i>cheB</i> | Response regulator protein-glutamate methylesterase |
| M4401450 | <i>cheA</i> | Two-component sensor histidine kinase               |
| M4401452 | <i>cheC</i> | Chemotaxis protein <i>cheC</i>                      |
| M4401861 | <i>cheR</i> | Chemotaxis protein methyltransferase                |

**Fig. S4.** Carotenoid synthesis and methyl-accepting chemotaxis protein (MCP) coding genes in *B. coahuilensis*. (A) Carotenoid synthesis genes are distributed in the *B. coahuilensis* genome. One operon contains both a synthase (*carB*) and desaturase (*crtI*) genes. Other *crtI* genes are found at different locations. Two of them are close to genes encoding transposases, suggesting that these were acquired through HGT. (B) Methyl-accepting proteins in the genome of *B. coahuilensis*. Some sensory rhodopsins are known to transduce their signal through MCPs. *B. coahuilensis* has 17 MCP coding genes. We do not know, however, whether these are involved in the phototransduction signaling.

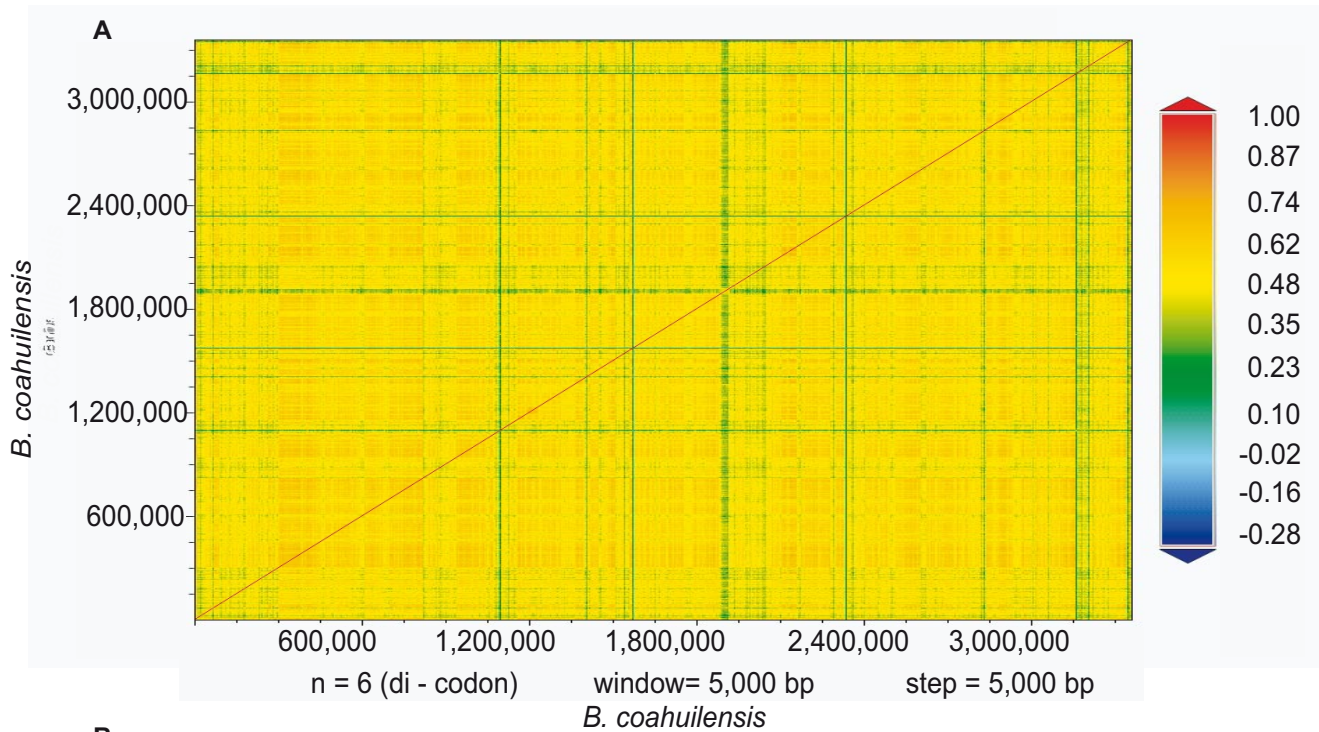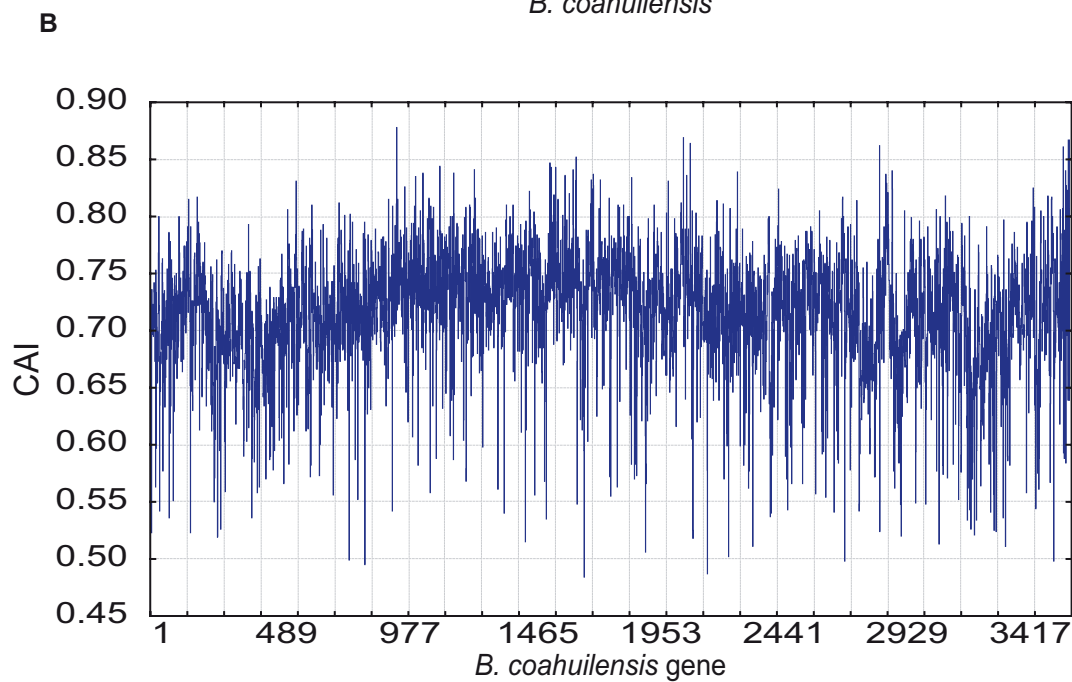

**Fig. 55.** Nucleotide composition analysis and Codon Adaptation Index analysis to detect Horizontal Gene Transfer events. (A) 5-plot for *B. coahuilensis* versus itself. Different Pearson correlation coefficients are represented on the plot by different colors. The plot leads to the identification of Regions of Unusual Composition (RUCPs) (see [SI Text](#)) within the genome of *B. coahuilensis*. (B) Codon Adaptation Index (CAI) of each predicted ORF of the genome of *B. coahuilensis*. The average CAI is  $0.7147 \pm 0.0537$ . An underaverage CAI could reflect recent insertion into the genome or function restrictions. Over average CAI probably means an adaptation to an effective transcription/translation rate.

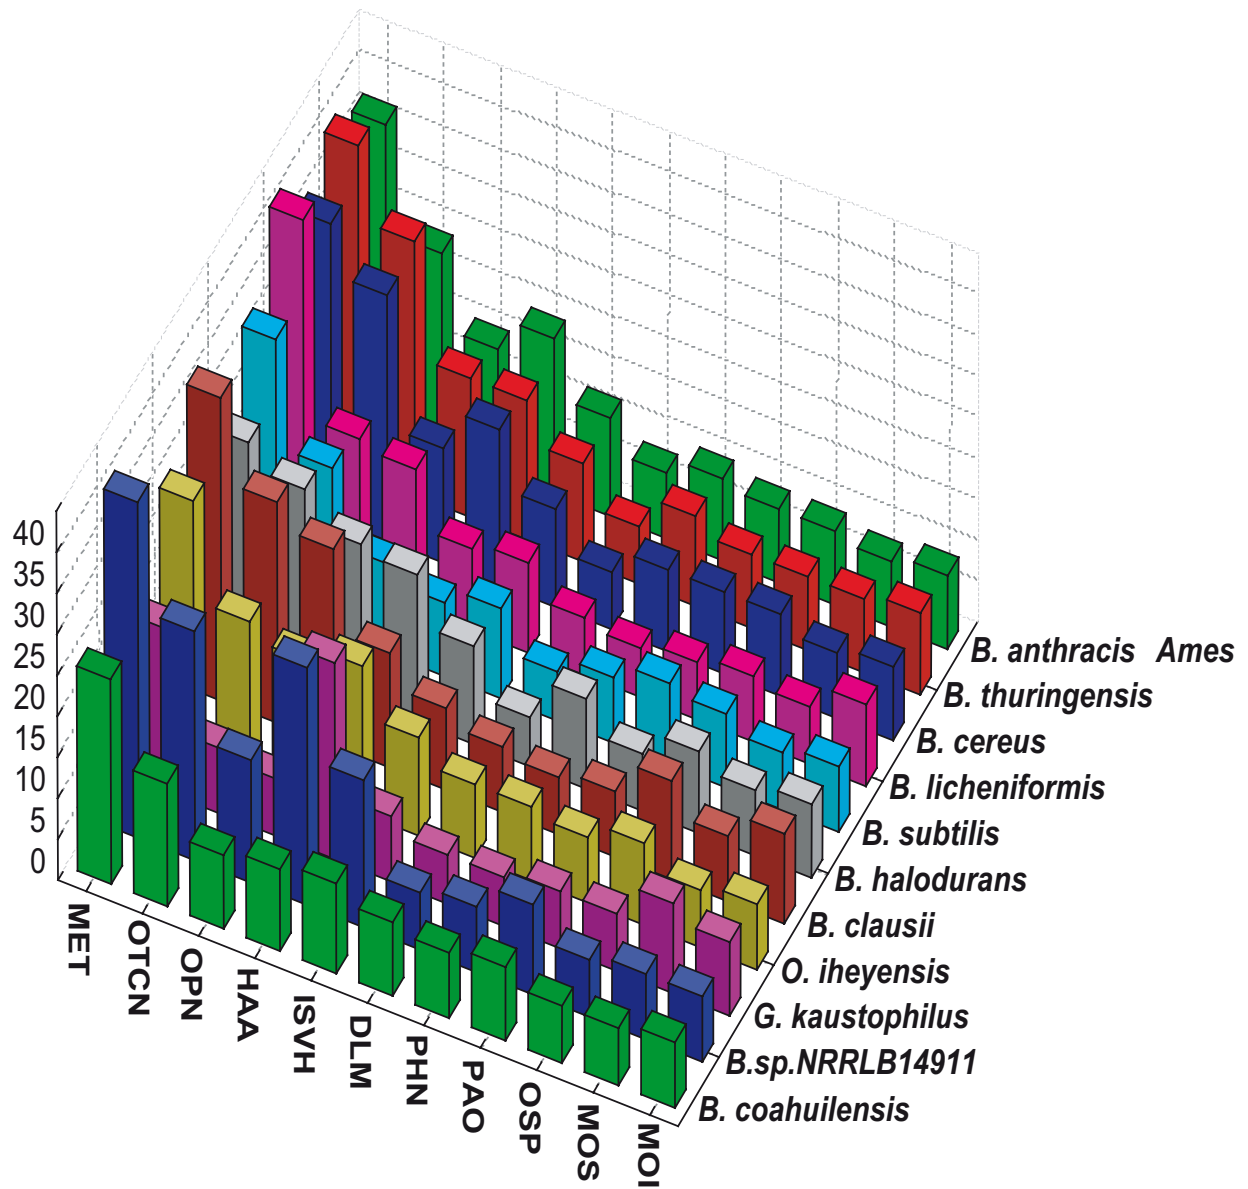

|      |                                            |
|------|--------------------------------------------|
| MET  | Metals                                     |
| OTCN | Osmoprotectans Taurine Cyanate and Nitrate |
| OPN  | Oligopeptides and Nickel                   |
| HAA  | Hydrophobic amino acids and amides         |
| ISVH | Iron-Siderophores Vitamin B-12 and Hemin   |
| DLM  | D- L-Methionine and derivates              |
| PHN  | Phosphonates and phosphites                |
| PAO  | Polar amino acid and opines                |
| OSP  | Oligosaccharides and polyols               |
| MOS  | Monosaccharides                            |
| MOI  | Mineral and Organic                        |

**Fig. S6.** Distribution of ABC importer families in the *Bacillus* spp. and closely related species. ABC importer gene families were searched by means of building and calibrating HMM profiles for each of the import families deposited in the ABCISSE database (<http://www.pasteur.fr/recherche/unites/pmtg/abc/database.iphtml>) to detect these genes in all of the sequenced *Bacillus* spp. Bars in different colors denote the presence of a gene predicted to code for a given importer with the height representing the number of genes present for any given category (see [SI Text](#)).





**Table S1. Genomic sequencing results**

| Runs                      | Reads     | Bases       | Contigs | Total length, Mb | Average length, kb | N50, kb |
|---------------------------|-----------|-------------|---------|------------------|--------------------|---------|
| 1                         | 158,013   | 16,348,073  | 1390    | 1.361            | 1                  | 1       |
| 2                         | 316,756   | 32,921,912  | 853     | 3.15             | 3.7                | 6.8     |
| 3                         | 471,089   | 48,929,738  | 242     | 3.277            | 13.5               | 29.5    |
| 4                         | 630,975   | 65,562,837  | 133     | 3.287            | 24.7               | 47.2    |
| 5                         | 792,282   | 82,130,316  | 112     | 3.29             | 29.4               | 53.5    |
| 6                         | 965,789   | 99,627,638  | 107     | 3.289            | 30.7               | 56.3    |
| 7                         | 1,294,112 | 136,203,848 | 107     | 3.321            | 31.54              | 62.98   |
| Assembly statistics       |           |             | Sanger  | 454              | 454 + Sanger       |         |
| Reads                     |           | 16,698      |         | 1,294,112        | -                  |         |
| Sequenced bases           |           | 20,709,240  |         | 136,203,848      | -                  |         |
| Total Mb (assembly)       |           | 2.492       |         | 3.321            | 3.351              |         |
| Number of contigs         |           | 876         |         | 107              | 73                 |         |
| Shortest contig, bp       |           | 46          |         | 498              | 1,379              |         |
| Longest contig, bp        |           | 37,164      |         | 136,892          | 256,258            |         |
| Non-ATCG bases (assembly) |           | 1,803       |         | 0                | 284                |         |

We used a hybrid 454/Sanger sequencing strategy and in this table we provide a summary of the assembly data.

Table S2. Comparison of genomic features among sequenced *Bacillus* spp.

| Strain                                                            | Ref. sequence   | GenBank      | Length, Mbp | GC content, % | Proteins | RNAs |
|-------------------------------------------------------------------|-----------------|--------------|-------------|---------------|----------|------|
| <i>Bacillus coahuilensis</i> str. M44                             | ABFU00000000    | ABFU00000000 | 3.358       | 37.5          | 3,640    | 87   |
| <i>Bacillus</i> sp. NRRL B-14911                                  | NZ_AAOX00000000 | AAOX00000000 | 5.086       | 45            | 5,691    | 106  |
| <i>Oceanobacillus iheyensis</i> HTE831                            | NC.004193       | BA000028     | 3.63        | 35            | 3,500    | 92   |
| <i>Geobacillus kaustophilus</i> HTA426                            | NC.006510       | BA000043     | 3.545       | 52            | 3,498    | 114  |
| <i>Bacillus subtilis</i> subsp. <i>subtilis</i> str. 168          | NC.000964       | AL009126     | 4.215       | 43            | 4,105    | 119  |
| <i>Bacillus clausii</i> KSM-K16                                   | NC.006582       | AP006627     | 4.304       | 44            | 4,096    | 96   |
| <i>Bacillus licheniformis</i> ATCC 14580*                         | NC.006270       | CP000002     | 4.222       | 46            | 4,152    | 93   |
| <i>Bacillus licheniformis</i> ATCC 14580 <sup>†</sup>             | NC.006322       | AE017333     | 4.223       | 46            | 4,196    | 93   |
| <i>Bacillus halodurans</i> C-125                                  | NC.002570       | BA000004     | 4.202       | 43            | 4,066    | 105  |
| <i>Bacillus anthracis</i> str. Ames                               | NC.003997       | AE016879     | 5.227       | 35            | 5,311    | 128  |
| <i>Bacillus anthracis</i> str. Sterne                             | NC.005945       | AE017225     | 5.229       | 35            | 5,287    | 128  |
| <i>Bacillus cereus</i> ATCC 10987                                 | NC.003909       | AE017194     | 5.224       | 35            | 5,603    | 133  |
| <i>Bacillus cereus</i> ATCC 14579 project at INRA                 | NC.004722       | AE016877     | 5.412       | 35            | 5,234    | 142  |
| <i>Bacillus cereus</i> E33L                                       | NC.006274       | CP000001     | 5.301       | 35            | 5,134    | 135  |
| <i>Bacillus thuringiensis</i> serovar <i>konkukian</i> str. 97–27 | NC.005957       | AE017355     | 5.238       | 35            | 5,117    | 144  |

\*Novozymes Biotech.

<sup>†</sup>Project at Gottingen Genom. Lab.

**Table S3. Twenty universally distributed Clusters of Orthologous Groups (COGs) used in the phylogenomic analysis**

| ID      | Av. length | Annotation                                        |
|---------|------------|---------------------------------------------------|
| COG0018 | 548        | Arginyl-tRNA synthetase                           |
| COG0049 | 182        | Ribosomal protein S7                              |
| COG0052 | 240        | Ribosomal protein S2                              |
| COG0080 | 154        | Ribosomal protein L11                             |
| COG0081 | 230        | Ribosomal protein L1                              |
| COG0087 | 288        | Ribosomal protein L3                              |
| COG0092 | 240        | Ribosomal protein S3                              |
| COG0094 | 182        | Ribosomal protein L5                              |
| COG0096 | 131        | Ribosomal protein S8                              |
| COG0097 | 177        | Ribosomal protein L6P/L9E                         |
| COG0098 | 220        | Ribosomal protein S5                              |
| COG0100 | 145        | Ribosomal protein S11                             |
| COG0172 | 442        | Seryl-tRNA synthetase                             |
| COG0200 | 166        | Ribosomal protein L15                             |
| COG0201 | 445        | Preprotein translocase subunit SecY               |
| COG0202 | 323        | DNA-directed RNA polymerase, alpha subunit        |
| COG0256 | 178        | Ribosomal protein L18                             |
| COG0495 | 854        | Leucyl-tRNA synthetase                            |
| COG0522 | 199        | Ribosomal protein S4 and related proteins         |
| COG0533 | 375        | Metal-dependent proteases with chaperone activity |



Table S4. ABC Importers proportion in a given category per genome and normalization relative to genome size

|             | <i>Bsu</i> | <i>Bha</i> | <i>Ban</i> | <i>Oih</i> | <i>Bth</i> | <i>Bli</i> | <i>Bce</i> | <i>Gka</i> | <i>Bcl</i> | <i>Bco</i> | <i>B14911</i> | Total |
|-------------|------------|------------|------------|------------|------------|------------|------------|------------|------------|------------|---------------|-------|
| MET         | 28         | 21         | 32         | 25         | 35         | 37         | 31         | 15         | 32         | 20         | 36            | 312   |
| OTCN        | 15         | 18         | 19         | 13         | 26         | 13         | 25         | 3          | 22         | 10         | 23            | 187   |
| OPN         | 6          | 14         | 10         | 11         | 12         | 12         | 9          | 2          | 19         | 4          | 10            | 109   |
| HAA         | 4          | 13         | 14         | 13         | 12         | 5          | 14         | 19         | 9          | 5          | 24            | 132   |
| ISVH        | 6          | 7          | 7          | 7          | 7          | 6          | 7          | 3          | 5          | 6          | 13            | 74    |
| DLM         | 1          | 1          | 3          | 4          | 2          | 2          | 2          | 1          | 3          | 4          | 2             | 25    |
| PHN         | 3          | 6          | 5          | 4          | 6          | 1          | 5          | 1          | 2          | 3          | 3             | 39    |
| PAO         | 5          | 2          | 4          | 3          | 4          | 2          | 5          | 2          | 3          | 4          | 6             | 40    |
| OSP         | 4          | 5          | 4          | 5          | 4          | 3          | 5          | 2          | 7          | 2          | 2             | 43    |
| MOS         | 2          | 3          | 3          | 2          | 4          | 2          | 3          | 6          | 3          | 2          | 3             | 33    |
| MOI         | 3          | 4          | 4          | 3          | 5          | 5          | 4          | 4          | 6          | 3          | 3             | 44    |
| TOTAL       | 77         | 94         | 105        | 90         | 117        | 88         | 110        | 58         | 111        | 63         | 125           | 1038  |
| Genome size | 4.22       | 4.2        | 5.23       | 3.63       | 5.24       | 4.22       | 5.22       | 3.54       | 4.3        | 3.36       | 5.09          |       |
| MET         | 6.63       | 5.00       | 6.12       | 6.89       | 6.68       | 8.76       | 5.93       | 4.23       | 7.43       | 5.95       | 7.08          |       |
| %           | 36.36      | 22.34      | 30.48      | 27.8       | 29.91      | 42.04      | 28.20      | 25.86      | 28.83      | 31.74      | 28.80         |       |
| OTCN        | 3.55       | 4.28       | 3.63       | 3.58       | 4.96       | 3.07       | 4.78       | 0.84       | 5.11       | 2.98       | 4.52          |       |
| %           | 19.48      | 19.15      | 18.09      | 14.4       | 22.22      | 14.77      | 22.73      | 5.17       | 19.82      | 15.87      | 18.40         |       |
| OPN         | 1.42       | 3.33       | 1.91       | 3.03       | 2.29       | 2.84       | 1.72       | 0.56       | 4.41       | 1.19       | 1.96          |       |
| %           | 7.79       | 14.89      | 9.52       | 12.2       | 10.25      | 13.63      | 8.18       | 3.45       | 17.11      | 6.35       | 8.00          |       |
| HAA         | 0.95       | 3.09       | 2.68       | 3.59       | 2.29       | 1.18       | 2.68       | 5.36       | 2.09       | 1.49       | 4.72          |       |
| %           | 5.19       | 13.83      | 13.33      | 14.4       | 10.25      | 5.68       | 12.73      | 32.76      | 8.11       | 8.11       | 19.20         |       |
| ISVH        | 1.42       | 1.66       | 1.34       | 1.93       | 1.33       | 1.42       | 1.34       | 0.84       | 1.16       | 1.79       | 2.55          |       |
| %           | 7.79       | 7.44       | 6.66       | 7.77       | 5.98       | 6.82       | 6.36       | 5.17       | 4.50       | 9.52       | 10.40         |       |
| DLM         | 0.24       | 0.24       | 0.57       | 1.10       | 0.38       | 0.47       | 0.38       | 0.28       | 0.70       | 1.19       | 0.39          |       |
| %           | 1.30       | 1.06       | 2.86       | 4.44       | 1.71       | 2.27       | 1.82       | 1.72       | 2.70       | 6.35       | 1.60          |       |
| PHN         | 0.71       | 1.43       | 0.96       | 1.10       | 1.14       | 0.24       | 0.96       | 0.28       | 0.46       | 0.89       | 0.59          |       |
| %           | 3.89       | 6.39       | 4.76       | 4.44       | 5.12       | 1.13       | 4.54       | 1.72       | 1.80       | 4.76       | 2.40          |       |
| PAO         | 1.18       | 0.47       | 0.76       | 0.82       | 0.76       | 0.47       | 0.96       | 0.56       | 0.70       | 1.19       | 1.18          |       |
| %           | 6.49       | 2.13       | 3.81       | 3.33       | 3.42       | 2.27       | 4.54       | 3.45       | 2.70       | 6.35       | 4.80          |       |
| OSP         | 0.95       | 1.19       | 0.76       | 1.38       | 0.76       | 0.71       | 0.96       | 0.56       | 1.62       | 0.59       | 0.39          |       |
| %           | 5.19       | 5.32       | 3.81       | 5.55       | 3.42       | 3.41       | 4.54       | 3.45       | 6.30       | 3.17       | 1.60          |       |
| MOS         | 0.47       | 0.71       | 0.57       | 0.55       | 0.76       | 0.47       | 0.57       | 1.69       | 0.70       | 0.59       | 0.59          |       |
| %           | 2.59       | 3.19       | 2.86       | 2.22       | 3.42       | 2.27       | 2.73       | 10.34      | 2.70       | 3.17       | 2.40          |       |
| MOI         | 0.71       | 0.95       | 0.76       | 0.82       | 0.95       | 1.18       | 0.76       | 1.13       | 1.39       | 0.89       | 0.59          |       |
| %           | 3.89       | 4.25       | 3.81       | 3.33       | 4.27       | 5.68       | 3.63       | 6.90       | 5.40       | 4.76       | 2.40          |       |

Normalized data: No. of transporters of a given class per genome size. %, transporters of a given class as percent of total number of transporters in that species. *Bsu*, *B. subtilis*; *Bha*, *B. halodurans*; *Ba*, *B. anthracis* AMES; *Oih*, *O. iheyensis*; *Bth*, *B. thuringensis*; *Bli*, *B. licheniformis*; *Bce*, *B. cereus*; *Gka*, *G. kaustophilus*; *Bcl*, *B. clusii*; *Bco*, *B. coahuilensis*; *B14911*, *B. sp.* NRRLB 14911.

**Table S5. Growth requirements of *B. coahuilensis* and *Bacillus* sp. NRRLB14911**

| Amino acid lacking    | <i>B. coahuilensis</i> | NRRLB14911 |
|-----------------------|------------------------|------------|
| L-Alanine             | +                      | +          |
| L-Aspartic            | +                      | +          |
| L-Glutamic            | -/+                    | +          |
| L-Asparagine          | +                      | +          |
| L-Glutamine           | +                      | +          |
| L-Arginine            | -/+                    | +          |
| L-Proline             | -                      | -/+        |
| L-Cysteine            | +                      | +          |
| L-Glycine             | +                      | +          |
| L-Serine              | -                      | +          |
| L-Lysine              | +                      | +          |
| L-Methionine          | -/+                    | -/+        |
| L-Threonine           | -                      | +          |
| L-Isoleucine          | -/+                    | +          |
| L-Leucine             | -/+                    | +          |
| L-Valine              | -                      | +          |
| L-Phenylalanine       | -                      | +          |
| L-Tryptophane         | -                      | +          |
| L-Tyrosine            | -                      | +          |
| L-Histidine           | -                      | +          |
| All amino acids added | +                      | +          |
| No amino acids added  | -                      | -/+        |

Modified marine medium containing the stated amino acids was inoculated with *B. coahuilensis* or NRRLB14911 and cultured at 37°C with agitation in nephelometric flasks. Absorbance was measured with a Klett-Summerson colorimeter at 24 and 48 h.

**Table S6. Comparative analysis of the presence in *B. coahuilensis* orthologs for selected sporulation, germination, and competence genes**

| <i>B. subtilis</i>               | Gene name                         | Function                                                                                                       | <i>B. coahuilensis</i> ortholog         | Orthologs in other <i>Bacillus</i> (when absent in <i>B. coahuilensis</i> ) |
|----------------------------------|-----------------------------------|----------------------------------------------------------------------------------------------------------------|-----------------------------------------|-----------------------------------------------------------------------------|
| <b>Sporulation initiation</b>    |                                   |                                                                                                                |                                         |                                                                             |
| BSU13990                         | <i>kinA</i>                       | two-component sensor histidine kinases                                                                         | M4401017 ( <i>kinA</i> )                |                                                                             |
| BSU31450                         | <i>kinB</i>                       |                                                                                                                | M4401019                                |                                                                             |
| BSU14490                         | <i>kinC</i>                       |                                                                                                                | ( <i>kinC</i> )                         |                                                                             |
| BSU13660                         | <i>kinD</i>                       |                                                                                                                | M4401702 ( <i>kinA</i> )                |                                                                             |
| BSU13530                         | <i>kinE</i>                       |                                                                                                                | M4402663 ( <i>kinA</i> )                |                                                                             |
|                                  |                                   |                                                                                                                | M4402848 ( <i>kinA</i> )                |                                                                             |
|                                  |                                   |                                                                                                                | M4400900 ( <i>kinB</i> )                |                                                                             |
|                                  |                                   |                                                                                                                | M4400627 ( <i>kinC</i> )                |                                                                             |
| BSU16170                         | <i>codY</i>                       | transcriptional repressor CodY                                                                                 | M4401419                                |                                                                             |
| BSU00370                         | <i>abrB</i>                       | transcriptional regulator                                                                                      | M4403643                                |                                                                             |
| BSU12430                         | <i>rapABC</i>                     | response regulator aspartate                                                                                   | Absent                                  | Bs (11) Bl                                                                  |
| BSU36690                         | <i>DEFGHI</i>                     | phosphatase                                                                                                    |                                         | (24) Bcg ( )                                                                |
| BSU03770                         |                                   |                                                                                                                |                                         | Bh (5) Bcl (9)                                                              |
| BSU36380                         |                                   |                                                                                                                |                                         |                                                                             |
| BSU25830                         |                                   |                                                                                                                |                                         |                                                                             |
| BSU37460                         |                                   |                                                                                                                |                                         |                                                                             |
| BSU40300                         |                                   |                                                                                                                |                                         |                                                                             |
| BSU06830                         |                                   |                                                                                                                |                                         |                                                                             |
| BSU05010                         |                                   |                                                                                                                |                                         |                                                                             |
| BSU02820                         |                                   |                                                                                                                |                                         |                                                                             |
| BSU18910                         |                                   |                                                                                                                |                                         |                                                                             |
| <b>Sporulation sigma factors</b> |                                   |                                                                                                                |                                         |                                                                             |
| BSU23450                         | <i>sigF</i>                       | sporulation sigma factor SigG                                                                                  | M4401792                                |                                                                             |
| BSU15330                         | <i>sigG</i>                       | sporulation sigma factor SigE                                                                                  | M4401332                                |                                                                             |
| BSU15320                         | <i>sigE</i><br>( <i>spollGB</i> ) | RNA polymerase sporulation specific sigma factor (sigma-K) (C-terminal half)                                   | M4401330                                |                                                                             |
| BSU26390                         | <i>sigK</i><br>( <i>spollIC</i> ) | sporulation sigma factor SigK                                                                                  | M4402263                                |                                                                             |
| BSU00980                         | <i>sigH</i>                       | Transition state sigma factor SigH                                                                             | M4400132                                |                                                                             |
| <b><i>spo0</i></b>               |                                   |                                                                                                                |                                         |                                                                             |
| BSU24220                         | <i>spo0A</i>                      | two-component response regulator                                                                               | M4402096                                |                                                                             |
| BSU27930                         | <i>spo0B</i>                      | sporulation initiation phosphotransferase                                                                      | M4402284                                |                                                                             |
| BSU13640                         | <i>spo0E</i>                      | negative sporulation regulatory phosphatase                                                                    | Absent                                  | Bs Bl NR                                                                    |
| BSU37130                         | <i>spo0F</i>                      | two-component response regulator                                                                               | M4403280                                |                                                                             |
| BSU40960                         | <i>spo0J</i>                      | site-specific DNA-binding protein                                                                              | M4400017                                |                                                                             |
| BSU11430                         | <i>spo0K</i><br>( <i>oppA</i> )   | oligopeptide ABC transporter (binding protein)                                                                 | Similar to<br>BM4400987 ( <i>dppE</i> ) |                                                                             |
| BSU08760                         | <i>spo0M</i>                      | sporulation-control gene                                                                                       | M4401200                                |                                                                             |
| <b><i>spoll</i></b>              |                                   |                                                                                                                |                                         |                                                                             |
| BSU23470                         | <i>spollAA</i>                    | anti-anti-sigma factor                                                                                         | M4401790                                |                                                                             |
| BSU23460                         | <i>spollAB</i>                    | anti-sigma F factor                                                                                            | M4403657                                |                                                                             |
| BSU28060                         | <i>spollB</i>                     | required for complete dissolution of the asymmetric septum (stage II sporulation)                              | Absent                                  | Bs Bl Bcg Bh NR                                                             |
| BSU36750                         | <i>spollD</i>                     | serine phosphatase                                                                                             | M4403330                                |                                                                             |
| BSU00640                         | <i>spollE</i>                     | protease                                                                                                       | M4400073                                |                                                                             |
| BSU15310                         | <i>spollGA</i>                    | required for dissolution of the septal cell wall (stage II sporulation)                                        | M4401329                                |                                                                             |
| BSU23530                         | <i>spollM</i>                     | required for dissolution of the septal cell wall (stage II sporulation)                                        | M4401782                                |                                                                             |
| BSU25530                         | <i>spollP</i>                     | required for completion of engulfment                                                                          | M4402279                                |                                                                             |
| BSU36550                         | <i>spollQ</i>                     | required for processing of pro-sigma-E (extracellular signal interacting with SpollGA?) (stage II sporulation) | BM4403333 ( <i>yebA</i> )               |                                                                             |
| BSU36970                         | <i>spollR</i>                     | required for processing of pro-sigma-E                                                                         | M4403297                                |                                                                             |
| BSU12830                         | <i>spollSA</i>                    | sporulation protein IISA                                                                                       | Absent                                  | Bs Bl Bcl                                                                   |
| BSU12820                         | <i>spollSB</i>                    | sporulation protein IISB                                                                                       | Absent                                  | Bs Bl                                                                       |
| <b><i>spollI</i></b>             |                                   |                                                                                                                |                                         |                                                                             |

| <i>B. subtilis</i> | Gene name       | Function                                                                                  | <i>B. coahuilensis</i><br>ortholog       | Orthologs in other <i>Bacillus</i> (when absent<br>in <i>B. coahuilensis</i> ) |
|--------------------|-----------------|-------------------------------------------------------------------------------------------|------------------------------------------|--------------------------------------------------------------------------------|
| BSU24430           | <i>spoIIIAA</i> | mutants block sporulation after engulfment                                                | M4402070                                 |                                                                                |
| BSU24420           | <i>spoIIAB</i>  | stage III sporulation protein SpoAB                                                       | M4402071                                 |                                                                                |
| BSU24400           | <i>spoIIAD</i>  | mutants block sporulation after engulfment (stage III sporulation)                        | M4402072                                 |                                                                                |
| BSU24390           | <i>spoIIAE</i>  | mutants block sporulation after engulfment (stage III sporulation)                        | M4402073                                 |                                                                                |
| BSU24380           | <i>spoIIAF</i>  | mutants block sporulation after engulfment (stage III sporulation)                        | M4402074                                 |                                                                                |
| BSU24370           | <i>spoIIAG</i>  | mutants block sporulation after engulfment (stage III sporulation)                        | M4402076                                 |                                                                                |
| BSU24360           | <i>spoIIAH</i>  | mutants block sporulation after engulfment (stage III sporulation)                        | M4402077                                 |                                                                                |
| BSU41040           | <i>spoIIJ</i>   | OxaA-like protein precursor                                                               | M4400009 ( <i>oxal</i> )                 |                                                                                |
| BSU36420           | <i>spoIIID</i>  | transcriptional regulator                                                                 | M4403334                                 |                                                                                |
| BSU16800           | <i>spoIIIE</i>  | DNA translocase                                                                           | M4401633 ( <i>ftsK</i> )                 |                                                                                |
| BSU41030           | <i>jag</i>      | SpoIIJ-associated protein                                                                 | M4400010                                 |                                                                                |
| <i>spoIV</i>       |                 |                                                                                           |                                          |                                                                                |
| BSU22800           | <i>spoIVA</i>   | required for proper spore cortex formation and coat assembly (stage IV sporulation)       | M4401851                                 |                                                                                |
| BSU24230           | <i>spoIVB</i>   | serine peptidase of the SA class                                                          | M4402095                                 |                                                                                |
| BSU25770           | <i>spoIVCA</i>  | site-specific DNA recombinase                                                             |                                          |                                                                                |
|                    | <i>spoIVFA</i>  | stage IV sporulation protein FA                                                           | M4402368                                 |                                                                                |
| BSU27970           | <i>spoIVFB</i>  | membrane metalloprotease                                                                  | M4402369                                 |                                                                                |
| BSU00230           | <i>bofA</i>     | inhibition of the pro-sigma-K processing machinery                                        | Similar to<br>BM4400117 and<br>BM4400031 | Bs Bl Bcg Bcl Bh Gk Oi NR                                                      |
| <i>spoV</i>        |                 |                                                                                           |                                          |                                                                                |
| BSU23440           | <i>spoVAA</i>   | sporulation protein VAA                                                                   | M4401793                                 |                                                                                |
| BSU23430           | <i>spoVAB</i>   | sporulation protein VAB                                                                   | Absent                                   | Bs Bl Bcg Oi Gk NR                                                             |
| BSU23420           | <i>spoVAC</i>   | sporulation protein VAC                                                                   | M4401923                                 | M4403660                                                                       |
| BSU23410           | <i>spoVAD</i>   | stage V sporulation protein SpoVAD                                                        | M4401924                                 | M4403661                                                                       |
| BSU23400           | <i>spoVAE</i>   | sporulation protein VAE                                                                   | M4401795                                 |                                                                                |
| BSU23390           | <i>spoVAF</i>   | sporulation protein VAF                                                                   | M4401796 and<br>M4402028                 |                                                                                |
| BSU27670           | <i>spoVB</i>    | involved in spore cortex synthesis (stage V sporulation)                                  | M4402312                                 |                                                                                |
| BSU15170           | <i>spoVD</i>    | penicillin-binding protein                                                                | M4401140                                 |                                                                                |
| BSU15210           | <i>spoVE</i>    | required for spore cortex peptidoglycan synthesis (stage V sporulation)                   | M4401145                                 |                                                                                |
| BSU00490           | <i>spoVG</i>    | required for spore cortex synthesis                                                       | M4400089                                 |                                                                                |
| BSU17420           | <i>spoVK</i>    | sporulation protein VK                                                                    | M4403653                                 |                                                                                |
| BSU15810           | <i>spoVM</i>    | required for normal spore cortex and coat synthesis (stage V sporulation)                 | M4403652                                 |                                                                                |
| BSU09400           | <i>spoVR</i>    | involved in spore cortex synthesis (stage V sporulation)                                  | M4400764                                 |                                                                                |
| BSU16980           | <i>spoVS</i>    | required for dehydration of the spore core and assembly of the coat (stage V sporulation) | M4401524                                 |                                                                                |
| BSU00560           | <i>spoVT</i>    | transcriptional regulator                                                                 | M4400082                                 |                                                                                |
| BSU28110           | <i>spoVID</i>   | required for assembly of the spore coat (stage VI sporulation)                            | M4402335                                 |                                                                                |
| BSU00430           | <i>yabG</i>     | hypothetical protein                                                                      | M4400097                                 |                                                                                |
| BSU04110           | <i>ycsK</i>     | hypothetical protein                                                                      | M4400277                                 |                                                                                |
| BSU31470           | <i>kapD</i>     | sporulation inhibitor KapD                                                                | M4402705                                 |                                                                                |
| BSU23190           | <i>dacB</i>     | D-alanyl-D-alanine carboxypeptidase                                                       | M4401803                                 |                                                                                |
| Spore coat         |                 |                                                                                           |                                          |                                                                                |
| BSU06300           | <i>cotA</i>     | spore coat protein (outer)                                                                | Absent                                   | Bs Bl Oi Bcl (Similar multicopper oxidases in Bh Gk Ba)                        |
| BSU36050           | <i>cotB</i>     | spore coat protein (outer)                                                                | Absent                                   | Bs Gk Bcg                                                                      |
| BSU17700           | <i>cotC</i>     | spore coat protein (outer)                                                                | Absent                                   | Bs                                                                             |
| BSU22200           | <i>cotD</i>     | spore coat protein (inner)                                                                | M4403659                                 |                                                                                |



| <i>B. subtilis</i> | Gene name          | Function                                                                         | <i>B. coahuilensis</i><br>ortholog                   | Orthologs in other <i>Bacillus</i> (when absent<br>in <i>B. coahuilensis</i> ) |
|--------------------|--------------------|----------------------------------------------------------------------------------|------------------------------------------------------|--------------------------------------------------------------------------------|
| BSU17030           | <i>cotE</i>        | morphogenic protein                                                              | M4401542 ( <i>cotE</i> )                             | Bs Bl Bcg Bh Bcl Oi NR                                                         |
| BSU40530           | <i>cotF</i>        | spore coat protein                                                               | Similar to<br>BM4403540 ( <i>yhcQ</i> )              | Bs Bl Bce Bt NR                                                                |
| BSU36070           | <i>cotG</i>        | morphogenetic protein                                                            | Absent                                               | Bs                                                                             |
| BSU36060           | <i>cotH</i>        | spore coat protein (inner)                                                       | Absent                                               | Bs Bl Bcg                                                                      |
| BSU06890           | <i>cotJA</i>       | polypeptide composition of the spore<br>coat; required for the assembly of CotJC | M4401829 ( <i>cotJA</i> )                            | Bs Bl Bcg NR                                                                   |
| BSU06900           | <i>cotJB</i>       | polypeptide composition of the spore coat                                        | M4403658 ( <i>cotJB</i> )                            | Bs Bl Bcg Gk NR                                                                |
| BSU06910           | <i>cotJC</i>       | polypeptide composition of the spore coat                                        | M4401828 ( <i>cotJC</i> )                            | Bs Bl Bcg NR                                                                   |
| BSU17970           | <i>cotM</i>        | spore coat protein (outer)                                                       | Similar to<br>BM4401693                              | Bs Bl NR                                                                       |
| BSU24620           | <i>cotN (tasA)</i> | spore coat protein                                                               | BM4402955 ( <i>cotN</i> )                            | Bs NR                                                                          |
| BSU05550           | <i>cotP</i>        | spore coat protein                                                               | Absent                                               | Bs NR                                                                          |
| BSU30900           | <i>cotS</i>        | spore coat protein                                                               | Similar to<br>M4403199                               | Bs Bl Bcg Bh NR                                                                |
| BSU30910           | <i>cotSA</i>       | spore coat protein                                                               | Absent                                               | Similar glycosyltransferases in Bs Bl Bcg<br>Gk Bh NR                          |
| BSU12090           | <i>cotT</i>        | spore coat protein (inner)                                                       | Absent                                               | Bs                                                                             |
| BSU11780           | <i>cotV</i>        | spore coat protein (insoluble fraction)                                          | Absent                                               | Bs Bl                                                                          |
| BSU11770           | <i>cotW</i>        | spore coat protein (insoluble fraction)                                          | Absent                                               | Bs Bl                                                                          |
| BSU11760           | <i>cotX</i>        | spore coat protein (insoluble fraction)                                          | M4403656                                             | Bs Bl Bce Bh Bcl Oi NR                                                         |
| BSU11750           | <i>cotY cotZ</i>   | spore coat protein (insoluble fraction)                                          | Absent                                               | Bs Bl Bcg Oi                                                                   |
| BSU11740           |                    |                                                                                  |                                                      |                                                                                |
| BSU27830           | <i>coxA</i>        | spore cortex protein                                                             | Absent                                               | Bs Bl                                                                          |
| BSU37910           | <i>spsA</i>        | spore coat polysaccharide synthesis                                              | Absent                                               | Bs Bh                                                                          |
| BSU37900           | <i>spsB</i>        | spore coat polysaccharide synthesis                                              | Absent                                               | Bs                                                                             |
| BSU37890           | <i>spsC</i>        | spore coat polysaccharide synthesis                                              | Absent                                               | Bs Bl Bcg Gk NR                                                                |
| BSU37880           | <i>spsD</i>        | spore coat polysaccharide synthesis                                              | Absent                                               | Bs                                                                             |
| BSU37870           | <i>spsE</i>        | spore coat polysaccharide synthesis                                              | Absent                                               | Bs Gk                                                                          |
| BSU37860           | <i>spsF</i>        | spore coat polysaccharide synthesis                                              | Absent                                               | Bs                                                                             |
| BSU37850           | <i>spsG</i>        | spore coat polysaccharide synthesis                                              | Absent                                               | Bs                                                                             |
| BSU37840           | <i>spsI</i>        | spore coat polysaccharide synthesis                                              | Absent                                               | Bs Bcg Bcl Bh Gk NR                                                            |
|                    |                    | (glucose-1 phosphate<br>thymidyltransferase)                                     |                                                      |                                                                                |
| BSU37830           | <i>spsJ</i>        | spore coat polysaccharide synthesis (dTDP<br>glucose 4,6-dehydratase/epimerase)  | Similar to<br>BM4403005                              | Bs Bcg Bcl Gk NR                                                               |
| BSU37820           | <i>spsK</i>        | spore coat polysaccharide synthesis<br>(dTDP-4-dehydrorhamnose reductase)        | Similar to<br>BM4400707 and<br>BM4403219 <i>strL</i> | Bs Bcg Bcl Bh Oi NR                                                            |
| BSU37810           | <i>spsL</i>        | spore coat polysaccharide synthesis<br>(dTDP-4-dehydrorhamnose epimerase)        | Absent                                               | Bs Bcg Bh Bcl Oi NR                                                            |
| BSU02070           | <i>csgA</i>        | sporulation-specific SASP protein                                                | Absent                                               | Bs Bl NR                                                                       |
| BSU22850           | <i>seaA</i>        | involved in spore envelope assembly                                              | M4401847 ( <i>yphB</i> )                             | Bs Bl Oi NR                                                                    |
| BSU29570           | <i>sspA sspB</i>   | small acid-soluble spore protein                                                 | M4403662 ( <i>sspA</i> )                             | Bs (4) Bl (6) Bc (6) Bt (7) Ban (6) Bcl(3) Bh<br>(3) Gk (1) Oi (1) NR (5)      |
| BSU09750           | <i>sspC sspD</i>   | (alpha/beta-type SASP)                                                           |                                                      |                                                                                |
| BSU19950           |                    |                                                                                  |                                                      |                                                                                |
| BSU13470           |                    |                                                                                  |                                                      |                                                                                |
| BSU08660           | <i>sspE</i>        | small acid-soluble spore protein<br>(gamma-type SASP)                            | BM4400675<br>(hypothetical)                          | Bs Bl Bcg Bcl Bh Oi NR                                                         |
| BSU32640           | <i>sspG</i>        | small acid-soluble spore protein                                                 | Absent                                               | Bs                                                                             |
| BSU00450           | <i>sspF</i>        | small acid-soluble spore protein<br>(alpha/beta-type SASP)                       | M4400095 ( <i>sspF</i> )                             |                                                                                |
| BSU28660           | <i>sspl</i>        | small acid-soluble spore protein Sspl                                            | M4402408 ( <i>sspl</i> )                             |                                                                                |
| BSU33340           | <i>sspl</i>        | small acid-soluble spore protein                                                 | Absent                                               | Bs Bl                                                                          |
| BSU22000           | <i>sspl</i>        | small acid-soluble spore protein                                                 | Absent                                               | Bs Bl                                                                          |
| BSU22290           | <i>sspl</i>        | small acid-soluble spore protein                                                 | Absent                                               | Bs Bl                                                                          |
| BSU18020           | <i>sspN</i>        | small acid-soluble spore protein                                                 | M4403655                                             |                                                                                |
| BSU17990           | <i>sspO</i>        | acid-soluble spore protein O                                                     | M4401690                                             |                                                                                |
| BSU18030           | <i>tlp</i>         | Tlp spore cortex-lytic enzyme                                                    | M4403654 ( <i>tlp</i> )                              |                                                                                |
| BSU22930           | <i>sleB</i>        | spore cortex-lytic enzyme                                                        | M4401837 ( <i>sleB</i> )                             |                                                                                |
| BSU13820           | <i>ykvT</i>        | hyp hypothetical protein                                                         | M4402316                                             |                                                                                |
| BSU23170           | <i>spmB</i>        | spore maturation protein                                                         | M4401806 ( <i>spmB</i> )                             |                                                                                |
| BSU23180           | <i>spmA</i>        | spore maturation protein                                                         | M4401805 ( <i>spmA</i> )                             |                                                                                |
| BSU13930           | <i>splB</i>        | spore photoproduct (thymine dimer) lyase                                         | M4400797 ( <i>splB</i> )                             |                                                                                |

| <i>B. subtilis</i> | Gene name                   | Function                                                                                                                 | <i>B. coahuilensis</i><br>ortholog                                                                                                | Orthologs in other <i>Bacillus</i> (when absent<br>in <i>B. coahuilensis</i> ) |
|--------------------|-----------------------------|--------------------------------------------------------------------------------------------------------------------------|-----------------------------------------------------------------------------------------------------------------------------------|--------------------------------------------------------------------------------|
| Germination        |                             |                                                                                                                          |                                                                                                                                   |                                                                                |
|                    |                             | (earliest stage)                                                                                                         | M4400597 ( <i>gerAB</i> )<br>M4401291( <i>gerAB</i> ),<br>M4401292,<br>M4401293 ( <i>gerIA</i> )<br>BM4403467 (MLA<br>incompleto) |                                                                                |
| BSU33070           | <i>gerAC</i>                | germination response to L-alanine and<br>related amino acids (earliest stage)                                            |                                                                                                                                   |                                                                                |
| BSU35800           | <i>gerBA</i>                | probable component of a germinant<br>receptor                                                                            | Absent                                                                                                                            | Bs                                                                             |
| BSU35810           | <i>gerBB</i>                | probable component of a germinant<br>receptor                                                                            | Absent                                                                                                                            | Bs                                                                             |
| BSU35820           | <i>gerBC</i>                | germination response to L-alanine and to<br>the combination of glucose, fructose,<br>L-asparagine, and KCl (early stage) | Absent                                                                                                                            | Bs                                                                             |
| BSU01550           | <i>gerD</i>                 | germination response to L-alanine and to<br>the combination of glucose, fructose,<br>L-asparagine, and KCl (early stage) | M4400170                                                                                                                          |                                                                                |
| BSU28410           | <i>gerE</i><br><i>gerIA</i> | transcriptional regulator<br>germination response to the combination<br>of glucose, fructose, L-asparagine, and<br>KCl   | M4402392<br>M4400595,<br>M4401293                                                                                                 |                                                                                |
| BSU03700           | <i>gerKA</i>                | germination response to the combination<br>of glucose, fructose, L-asparagine, and<br>KCl                                | M4403644                                                                                                                          |                                                                                |
| BSU03720           | <i>gerKB</i>                | germination response to the combination<br>of glucose, fructose, L-asparagine, and<br>KCl                                | Absent (in its place<br>there is a distant<br><i>ger</i> gene,<br>M4403466)                                                       |                                                                                |
| BSU03710           | <i>gerKC</i>                | germination (cortex hydrolysis) and<br>sporulation (stage II, multiple polar<br>septa)                                   | M4403467                                                                                                                          |                                                                                |
| BSU28380           | <i>gerM</i>                 | spore germination protein                                                                                                | M4402396                                                                                                                          |                                                                                |
| BSU10720           | <i>gerPA</i>                | spore germination protein                                                                                                | M4403651                                                                                                                          |                                                                                |
| BSU10710           | <i>gerPB</i>                | spore germination protein                                                                                                | M4403650                                                                                                                          |                                                                                |
| BSU10700           | <i>gerPC</i>                | spore germination protein                                                                                                | M4403649                                                                                                                          |                                                                                |
| BSU10690           | <i>gerPD</i>                | spore germination protein                                                                                                | M4403648                                                                                                                          |                                                                                |
| BSU10680           | <i>gerPE</i>                | spore germination protein                                                                                                | M4403647                                                                                                                          |                                                                                |
| BSU10670           | <i>gerPF</i>                | spore germination protein ( <i>ywdL</i> )                                                                                | M4403646                                                                                                                          |                                                                                |
| BSU15090           | <i>gerQ</i>                 | spore germination protein; Prespore<br>Specific Transcriptional Activator ( <i>y/bO</i> )                                | BM4401120                                                                                                                         |                                                                                |
| BSU37620           | <i>gerR</i>                 | transcriptional regulatory protein                                                                                       | BM4403368 ( <i>rsfA</i> )                                                                                                         |                                                                                |
| BSU25540           | <i>gpr</i>                  | Germination protease precursor                                                                                           | M4402278                                                                                                                          |                                                                                |
| Competence         |                             |                                                                                                                          |                                                                                                                                   |                                                                                |
|                    |                             | protein A                                                                                                                |                                                                                                                                   |                                                                                |
| BSU31690           | <i>comP</i>                 | two-component sensor histidine kinase                                                                                    | Absent                                                                                                                            | Bs Bl Bc Bt                                                                    |
| BSU16930           | <i>cinA</i>                 | competence damage-inducible protein A                                                                                    | M4401517                                                                                                                          |                                                                                |
| BSU03430           | <i>nucA</i>                 | nuclease                                                                                                                 | Absent                                                                                                                            | Bs Bl Bcg                                                                      |
| BSU03420           | <i>nin</i>                  | inhibition of the DNA degrading activity<br>of NucA                                                                      | Absent                                                                                                                            | Bs Bl Bcg                                                                      |
|                    | <i>comC</i>                 | DNA-binding protein                                                                                                      | M4402351                                                                                                                          |                                                                                |
| BSU03500           | <i>comS</i>                 | regulation of genetic competence                                                                                         | Absent                                                                                                                            | Bs                                                                             |
| BSU25590           | <i>comEA</i>                | unspecific high-affinity DNA-binding<br>protein                                                                          | M4402274                                                                                                                          |                                                                                |
| BSU25580           | <i>comEB</i>                | required for DNA binding and uptake                                                                                      | M4402275                                                                                                                          |                                                                                |
| BSU25570           | <i>comEC</i>                | putative integral membrane protein                                                                                       | M4402276                                                                                                                          |                                                                                |
| BSU25600           | <i>comER</i>                | late competence protein                                                                                                  | M4402272                                                                                                                          |                                                                                |
| BSU35470           | <i>comFA</i>                | late competence protein                                                                                                  | M4403036                                                                                                                          |                                                                                |
| BSU35450           | <i>comFC</i>                | competence protein                                                                                                       | M4403037                                                                                                                          |                                                                                |
| BSU24730           | <i>comGA</i>                | probably part of the DNA transport<br>machinery                                                                          | M4402041                                                                                                                          |                                                                                |
| BSU24720           | <i>comGB</i>                | probably part of the DNA transport<br>machinery                                                                          | M4402042                                                                                                                          |                                                                                |
| BSU24710           | <i>comGC</i>                | probably part of the DNA transport<br>machinery                                                                          | M4402043                                                                                                                          |                                                                                |



Table S7. Cell envelope, biogenesis and cell division proteins in *B. coahuilensis* in comparison to *B. subtilis* and other *Bacillus* spp.

|                                    | <i>B. subtilis</i> *                                                                                                                                                              | Function                                                                                   | Possible orthologs in <i>B. coahuilensis</i>                                                                                                                                                      | Orthologs in other <i>Bacillus</i> <sup>†</sup> (when absent in <i>B. coahuilensis</i> ) |
|------------------------------------|-----------------------------------------------------------------------------------------------------------------------------------------------------------------------------------|--------------------------------------------------------------------------------------------|---------------------------------------------------------------------------------------------------------------------------------------------------------------------------------------------------|------------------------------------------------------------------------------------------|
| Fatty acid synthesis               |                                                                                                                                                                                   |                                                                                            |                                                                                                                                                                                                   |                                                                                          |
| Initiation of fatty acid synthesis | <i>accA</i> <sup>‡</sup> , <i>B</i> <sup>‡</sup> , <i>C</i> <sup>‡</sup> , <i>D</i> <sup>‡</sup> , <i>acpA</i> <sup>‡</sup> , <i>fabD</i> <sup>‡</sup> , <i>birA</i> <sup>‡</sup> |                                                                                            | M4402554 ( <i>accA</i> ), M4402080 ( <i>accB</i> ), M4402081 and M4401121 ( <i>accC</i> ), M4402553 ( <i>accD</i> ), M4401388 ( <i>acpA</i> ), M4401386 ( <i>fabD</i> ), M4401885 ( <i>birA</i> ) |                                                                                          |
| Fatty acid chain elongation        | <i>fabHA</i> , <i>fabHB</i><br><i>fabF</i> <sup>‡</sup> , <i>G</i> <sup>‡</sup>                                                                                                   | Overlapping function                                                                       | M4400982 ( <i>fabHA</i> )<br>M4400983 ( <i>fabF</i> ) M4401387 ( <i>fabG</i> )<br>(seven more 3-oxoacyl-[acyl carrier-protein] reductase)                                                         |                                                                                          |
| Phospholipid synthesis             | <i>fabI</i> <i>fabL</i><br><i>ywpB</i> (= <i>fabZ</i> ), <i>ycsD</i><br><i>gpsA</i>                                                                                               | Overlapping function<br>Overlapping function                                               | M4401919 ( <i>fabI</i> )<br>M4403340 ( <i>fabZ</i> )<br>M4401849 ( <i>gpsA</i> )                                                                                                                  |                                                                                          |
|                                    | <i>yhdO</i> <sup>‡</sup>                                                                                                                                                          | Similar to 1-acylglycerol-3-phosphate <i>O</i> -acyltransferase                            | Similar to BM4401843 LPAT1 and BM4401172 LPAT1 (chloroplast)                                                                                                                                      |                                                                                          |
|                                    | <i>cdsA</i> <sup>‡</sup>                                                                                                                                                          | Phosphatidate cytidyltransferase                                                           | M4401481 ( <i>cdsA</i> )                                                                                                                                                                          |                                                                                          |
|                                    | <i>pgsA</i> <sup>‡</sup>                                                                                                                                                          | CDP-diacylglycerol-glycerol-3-phosphate 3-phosphatidyltransferase                          | M4401516 ( <i>pgsA</i> )                                                                                                                                                                          |                                                                                          |
|                                    | <i>ywjE</i> , <i>ywnE</i> , <i>ywiE</i>                                                                                                                                           | Cardiolipin synthetase (overlapping function)                                              | M4403386 ( <i>ywjE</i> ) M4400996 ( <i>cls</i> ), M4401628 ( <i>cls</i> )                                                                                                                         |                                                                                          |
|                                    | <i>yerQ</i> <sup>‡</sup> , <i>dgkA</i>                                                                                                                                            | Diacylglycerol kinase, overlapping function                                                | Similar to M4400357 ( <i>bmrU</i> ), M4400531 ( <i>bmrU</i> ) M4402174 ( <i>dgkA</i> )                                                                                                            |                                                                                          |
|                                    | <i>ugtP</i>                                                                                                                                                                       | Glycosyltransferase                                                                        | Putative glycosyl transferase BM4401162 ( <i>ypfP</i> )                                                                                                                                           |                                                                                          |
|                                    | <i>pssA</i>                                                                                                                                                                       | Phosphatidylserine synthase                                                                | <b>Absent</b>                                                                                                                                                                                     | <i>Bs</i> , <i>Bl</i> , <i>Bcg</i> , <i>Bh</i> , <i>Gk</i> , <i>NR</i>                   |
|                                    | <i>psd</i>                                                                                                                                                                        | Phosphatidylserine decarboxylase                                                           | <b>Absent</b>                                                                                                                                                                                     | <i>Bs</i> , <i>Bl</i> , <i>Bcg</i> , <i>Bh</i> , <i>Gk</i> , <i>NR</i>                   |
|                                    | <i>plsX</i> <sup>‡</sup>                                                                                                                                                          | Fatty acid/phospholipid synthesis protein                                                  | M4401385 ( <i>plsX</i> )                                                                                                                                                                          |                                                                                          |
| Peptidoglycan synthesis            |                                                                                                                                                                                   |                                                                                            |                                                                                                                                                                                                   |                                                                                          |
| Synthesis of amino sugars          | <i>glmS</i> <sup>‡</sup>                                                                                                                                                          | Glucosamine-fructose-6-phosphate aminotransferase [isomerizing]                            | M4400183 ( <i>glmS</i> )                                                                                                                                                                          |                                                                                          |
|                                    | <i>ybbT</i> ( <i>glmM</i> ) <sup>‡</sup>                                                                                                                                          | Phosphoglucosamine mutase                                                                  | M4400182 ( <i>glmM</i> )                                                                                                                                                                          |                                                                                          |
|                                    | <i>gcaD</i> <sup>‡</sup>                                                                                                                                                          | Bifunctional protein                                                                       | M4400088 ( <i>gcaD</i> )                                                                                                                                                                          |                                                                                          |
|                                    | <i>yvyH</i> ( <i>mnaA</i> ) <sup>‡</sup>                                                                                                                                          | UDP- <i>N</i> -acetylglucosamine-2-epimerase                                               | M4402980 ( <i>mnaA</i> )                                                                                                                                                                          |                                                                                          |
|                                    | <i>nagA</i>                                                                                                                                                                       | <i>N</i> -Acetylglucosamine-6-phosphate deacetylase                                        | M4402950 and M4403240 ( <i>nagA</i> )                                                                                                                                                             |                                                                                          |
|                                    | <i>nagB</i> , <i>gamA</i> ( <i>ybfT</i> )                                                                                                                                         | Glucosamine-6-phosphate deaminase (overlapping function)                                   | M4403241 ( <i>nagB</i> )                                                                                                                                                                          |                                                                                          |
|                                    | <i>pgi</i> <sup>‡</sup><br><i>gtaB</i>                                                                                                                                            | Glucose-6-phosphate isomerase A<br>UTP-glucose-1-phosphate uridylyltransferase             | M4403532 ( <i>pgiA</i> )<br>M4403211/M4403022 ( <i>gtaB</i> )                                                                                                                                     |                                                                                          |
|                                    | <i>tagE</i>                                                                                                                                                                       | UDP-glucose:polyglycerol phosphate glucosyltransferase                                     | <b>Absent</b>                                                                                                                                                                                     | <i>Bs</i> , <i>Bcl</i>                                                                   |
|                                    | <i>nagP</i>                                                                                                                                                                       | Ohosphotransferase system (PTS) <i>N</i> -acetylglucosamine-specific enzyme IICB component | Similar to M4403536 ( <i>nagE</i> )                                                                                                                                                               |                                                                                          |
|                                    | <i>gamP</i>                                                                                                                                                                       | Probable PTS glucosamine-specific enzyme IICBA component                                   | Similar to M4400583 ( <i>ptsG</i> )                                                                                                                                                               |                                                                                          |
| Diaminopimelate                    | <i>dapG</i> , <i>lysC</i> , <i>yclM</i><br><i>asd</i>                                                                                                                             | Overlapping function                                                                       | M4401459 ( <i>dapG</i> ), M4402386 ( <i>lysC</i> )<br>M4401460 ( <i>asd</i> )                                                                                                                     |                                                                                          |





|                         | <i>B. subtilis</i> *                                                                                                                                                                         | Function                                                                        | Possible orthologs in <i>B. coahuilensis</i>                                                                                                                                                                                                                                                                                                           | Orthologs in other <i>Bacillus</i> <sup>†</sup> (when absent in <i>B. coahuilensis</i> ) |
|-------------------------|----------------------------------------------------------------------------------------------------------------------------------------------------------------------------------------------|---------------------------------------------------------------------------------|--------------------------------------------------------------------------------------------------------------------------------------------------------------------------------------------------------------------------------------------------------------------------------------------------------------------------------------------------------|------------------------------------------------------------------------------------------|
|                         | <i>tuaF</i>                                                                                                                                                                                  | Membrane bound, unknown function                                                | <b>Absent</b>                                                                                                                                                                                                                                                                                                                                          | <i>Bs, Bl</i>                                                                            |
| Cell shape and division |                                                                                                                                                                                              |                                                                                 |                                                                                                                                                                                                                                                                                                                                                        |                                                                                          |
| Septum formation        | <i>ftsA</i> <sup>‡</sup><br><i>ftsW</i> <sup>‡</sup><br><i>ftsZ</i> <sup>‡</sup><br><i>ftsL</i> <sup>‡</sup><br><i>divIB</i> <sup>‡</sup> , <i>C</i> <sup>‡</sup> , <i>pbpB</i> <sup>‡</sup> | Penicillin-binding protein 2B                                                   | M4401327 ( <i>ftsA</i> ), M4402492 ( <i>ftsA</i> )<br>M4400657 ( <i>ftsW</i> ), M4401090 ( <i>ylaO</i> )<br>M4401328 ( <i>ftsZ</i> )<br>Similar to M4402000 ( <i>yqgB</i> )<br>M4401322 <i>divIB</i> , ( <i>divIC</i> , similar to M4400077), M4401139 ( <i>pbpB</i> )<br>M4400360 ( <i>ywcF</i> ), M4402361 ( <i>mreB</i> ), M4402362 ( <i>mreC</i> ) |                                                                                          |
| Cell shape              | <i>rodA</i> <sup>‡</sup> , <i>mreB</i> <sup>‡</sup> , <i>C</i> <sup>‡</sup>                                                                                                                  |                                                                                 |                                                                                                                                                                                                                                                                                                                                                        |                                                                                          |
| Capsule <sup>¶</sup>    | <i>capA</i>                                                                                                                                                                                  | Poly-gamma-glutamic synthesis                                                   | M441683 ( <i>capA</i> ) M441686 ( <i>capA</i> )<br>(MLA roto? le faltan unos 100 aas se juntan los dos genes)                                                                                                                                                                                                                                          | <i>Bs (pga)</i> , <i>Bcg</i> , <i>Oi</i>                                                 |
|                         | <i>capD</i>                                                                                                                                                                                  | Capsular polysaccharide biosynthesis protein <i>capD</i>                        | M4403209 ( <i>capD</i> )                                                                                                                                                                                                                                                                                                                               | <i>Bs (yveM)</i> , <i>Bl</i> , <i>Bce</i> , <i>Bh</i> , <i>Oi</i> , <i>NR</i>            |
|                         | <i>capI</i>                                                                                                                                                                                  | NAD-dependent epimerase/dehydratase                                             | M44000268 ( <i>capI</i> )                                                                                                                                                                                                                                                                                                                              | <i>Bt</i> , <i>Bh</i> , <i>Oi</i> , <i>NR</i>                                            |
|                         | <i>icaA</i>                                                                                                                                                                                  | Biofilm PIA synthesis<br><i>N</i> -acetylglucosaminyltransferase<br><i>icaA</i> | M4402203 ( <i>icaA</i> ) 2977 M4403023                                                                                                                                                                                                                                                                                                                 | <i>Bh</i> , <i>Gk</i> , <i>NR</i>                                                        |
|                         | <i>swrC</i>                                                                                                                                                                                  |                                                                                 | M4401621 M4401624                                                                                                                                                                                                                                                                                                                                      |                                                                                          |

\*In bold, genes for which no ortholog is found in *B. coahuilensis*. In parentheses, alternative name given to a gene.

<sup>†</sup>Whenever no ortholog was found in *B. coahuilensis* we searched in the genomes of other *Bacillus* to determine how common this absence was in this genre. *Bs*, *B. subtilis*; *Bl*, *B. licheniformis*; *Bce*, *B. cereus*; *Ba*, *B. anthracis*; *Bt*, *B. thuringiensis*; *Bcg*, *Bacillus cereus* group (encloses *Bce*, *Ba*, and *Bt*); *Bcl*, *B. clausii*; *Oi*, *O. iheyensis*; *Gk*, *Geobacillus kaustophilus* HTA426; *NR*, *B. sp.* NRRL11194).

<sup>‡</sup>Essential in *B. subtilis* [Kobayashi K, et al. (2003) Essential *Bacillus subtilis* genes. *Proc Natl Acad Sci USA* 100:4678–4683].

<sup>§</sup>Suggested to be involved in the synthesis of other cell wall polyanionic acids [Soldo B, Lazarevick V, Karamata D (2002) *tagO* is involved in the synthesis of all anionic cell-wall polymers in *Bacillus subtilis*. *Microbiology* 20, Vol. 148:2079–2087].

<sup>¶</sup>Genes that may be involved in capsule formation are not all present in *B. subtilis*. There are 137 genes annotated in this functional category of which we only show a selected set.

Table 8. Analysis of the presence in *B. coahuilensis* of the *B. subtilis* genes constituting the phosphate regulon

| Induced in <i>Bs</i> by limiting phosphate      | Gene/operon                     | Function                                                                                                                                                                 | <i>B. coahuilensis</i> ortholog*                                                                       | Orthologs in other <i>Bacillus</i> <sup>†</sup> (when absent in <i>B. coahuilensis</i> ) |
|-------------------------------------------------|---------------------------------|--------------------------------------------------------------------------------------------------------------------------------------------------------------------------|--------------------------------------------------------------------------------------------------------|------------------------------------------------------------------------------------------|
|                                                 | <i>phoP</i>                     | Alkaline phosphatase synthesis transcriptional regulatory protein                                                                                                        | M4402201 ( <i>phoP</i> )<br>M4402563 ( <i>phoP</i> )                                                   |                                                                                          |
|                                                 | <i>phoR</i>                     | Alkaline phosphatase synthesis sensor protein                                                                                                                            | M4402564 ( <i>phoR</i> )                                                                               |                                                                                          |
|                                                 | <i>phoB</i>                     | Alkaline phosphatase III (secreted)                                                                                                                                      | M4403423 ( <i>phoB</i> )                                                                               |                                                                                          |
|                                                 | <i>ydhF</i>                     | Unknown                                                                                                                                                                  | <b>Absent</b>                                                                                          | <i>Bs</i>                                                                                |
|                                                 | <i>pstS</i>                     | High-affinity phosphate ABC transporter                                                                                                                                  | M4402010 ( <i>sphX</i> )                                                                               |                                                                                          |
|                                                 | <i>pstC</i>                     | Phosphate transport system permease                                                                                                                                      | BM4402011 ( <i>yqgH</i> )                                                                              |                                                                                          |
|                                                 | <i>pstA</i>                     | Phosphate transport system permease                                                                                                                                      | M4402012 ( <i>pstA-1</i> )                                                                             |                                                                                          |
|                                                 | <i>pstBA</i>                    | Phosphate ABC transporter (ATP-binding protein)                                                                                                                          | M4402013 ( <i>pstB</i> )                                                                               |                                                                                          |
|                                                 | <i>pstBB</i>                    | Phosphate ABC transporter (ATP-binding protein)                                                                                                                          | <b>Absent</b>                                                                                          | <i>Bs BI</i>                                                                             |
|                                                 | <i>phoD</i>                     | Phosphodiesterase possibly for teichoic acid turnover                                                                                                                    | <b>Absent</b>                                                                                          | <i>Bs BI</i>                                                                             |
|                                                 | <i>tatAD</i>                    | Similar to hypothetical proteins                                                                                                                                         | <b>Absent</b>                                                                                          | <i>Bs BI Ba Bcl Gk Oi NR</i>                                                             |
|                                                 | <i>resA</i>                     | Thiol-disulfide oxidoreductase                                                                                                                                           | M4401809 ( <i>resA</i> )                                                                               |                                                                                          |
|                                                 | <i>resB</i>                     | Required for cytochrome c synthesis                                                                                                                                      | M4401810 ( <i>resB</i> )                                                                               |                                                                                          |
|                                                 | <i>resC</i>                     | Required for cytochrome c synthesis                                                                                                                                      | M4401811 ( <i>resC</i> )                                                                               |                                                                                          |
|                                                 | <i>resD</i>                     | Transcriptional regulatory protein                                                                                                                                       | M4401812 ( <i>resD</i> )                                                                               |                                                                                          |
|                                                 | <i>resE tuaABCDEFGH glpQ</i>    | Sensor protein teichuronic acid biosynthesis glycerol phosphoryl diester phosphodiesterase (hydrolysis of deacetylated phospholipids; (secreted) Alkaline phosphatase    | M4401813 and M4400914 ( <i>resE</i> ) <b>Absent</b> Similar to BM4402098 ( <i>yqiK</i> ) <b>Absent</b> | See Table S6<br>A single AP also in <i>Bh Bcl Gk Oi NR</i>                               |
|                                                 | <i>phoA</i>                     |                                                                                                                                                                          |                                                                                                        |                                                                                          |
|                                                 | <i>tatCD ykoL</i>               | Twin arginine transporter, unknown function                                                                                                                              | <b>Absent</b> (has <i>tatCy</i> ) <b>Absent</b>                                                        | <i>Bs BI Bcg Bh Bcl Gk Oi NR Bs BI</i>                                                   |
|                                                 | <i>yttP</i>                     | Probable HTH-type transcriptional regulator, unknown function                                                                                                            | M4402509 ( <i>yttP</i> )                                                                               |                                                                                          |
|                                                 | <i>ydbD yurl</i>                | Similar to manganese containing catalase Extracellular RNase                                                                                                             | M4401506 ( <i>ydbD</i> )<br>M4400550 ( <i>bsn</i> )                                                    |                                                                                          |
|                                                 | <i>yjdB vpr</i>                 | Unknown extracellular serine protease                                                                                                                                    | <b>Absent</b> M4403315 ( <i>vpr</i> )                                                                  | <i>Bs</i>                                                                                |
|                                                 | <i>lytB rapA glcU cotP yfkN</i> | Modifier protein of LytC response regulator                                                                                                                              | <b>Absent</b>                                                                                          | See Table S5<br><i>Bs BI Bcg NR</i>                                                      |
|                                                 |                                 | Aspartate phosphatase glucose uptake                                                                                                                                     | <b>Absent</b>                                                                                          |                                                                                          |
|                                                 |                                 | Spore coat protein similar to 2',3' cyclic nucleotide 2' phosphodiesterase                                                                                               | <b>Absent</b>                                                                                          |                                                                                          |
| Repressed                                       | <i>tagAB tagDEF</i>             | Polyglycerol teichoic acid                                                                                                                                               | <b>Absent</b><br><b>Absent</b>                                                                         | See Table S6                                                                             |
| Related genes present in <i>B. coahuilensis</i> | <i>resD phoR cpdB phoU</i>      | Two-component response regulator<br>Two-component sensor histidine kinase 2',3'-cyclic nucleotide 2'-phosphodiesterase precursor<br>negative regulator of the Pi regulon | M4400235 ( <i>resD</i> ) M4400236 ( <i>phoR</i> ) M4400483 ( <i>cpdB</i> )<br>M4402014 ( <i>phoU</i> ) | See Table S6<br><i>Bcg Bh Bcl NR</i>                                                     |

\*In bold, genes for which no ortholog is found in *B. coahuilensis*. In parentheses, name given to the *B. coahuilensis* gene.

<sup>†</sup>When no ortholog was found in *B. coahuilensis* we searched in the genomes of other *Bacillus* spp. and closely related species to determine how common this absence was. For genes coding for proteins of <100 residues, we looked for synteny and searched at the corresponding location. *Bs*, *B. subtilis*; *Bl*, *B. licheniformis*; *Bce*, *B. cereus*; *Ba*, *B. anthracis*; *Bt*, *B. thuringiensis*; *Bcg*, *Bacillus cereus* group (encloses *Bce*, *Ba*, and *Bt*); *Bcl*, *B. clausii*; *Oi*, *O. iheyensis*; *Bk*, *B. kaustophilus*; *NR*, *Bacillus* sp. NRRL11194.
